# Supplementary material for: Genome-Wide Identification and Expression Analyses of the FAR1/FHY3 Gene Family Provide Insight into Inflorescence Development in Maize
Source: MDPI journal article supplement (doi:10.3390/cimb46010027), 2024-01-02
Supplement: s1 [file s1]

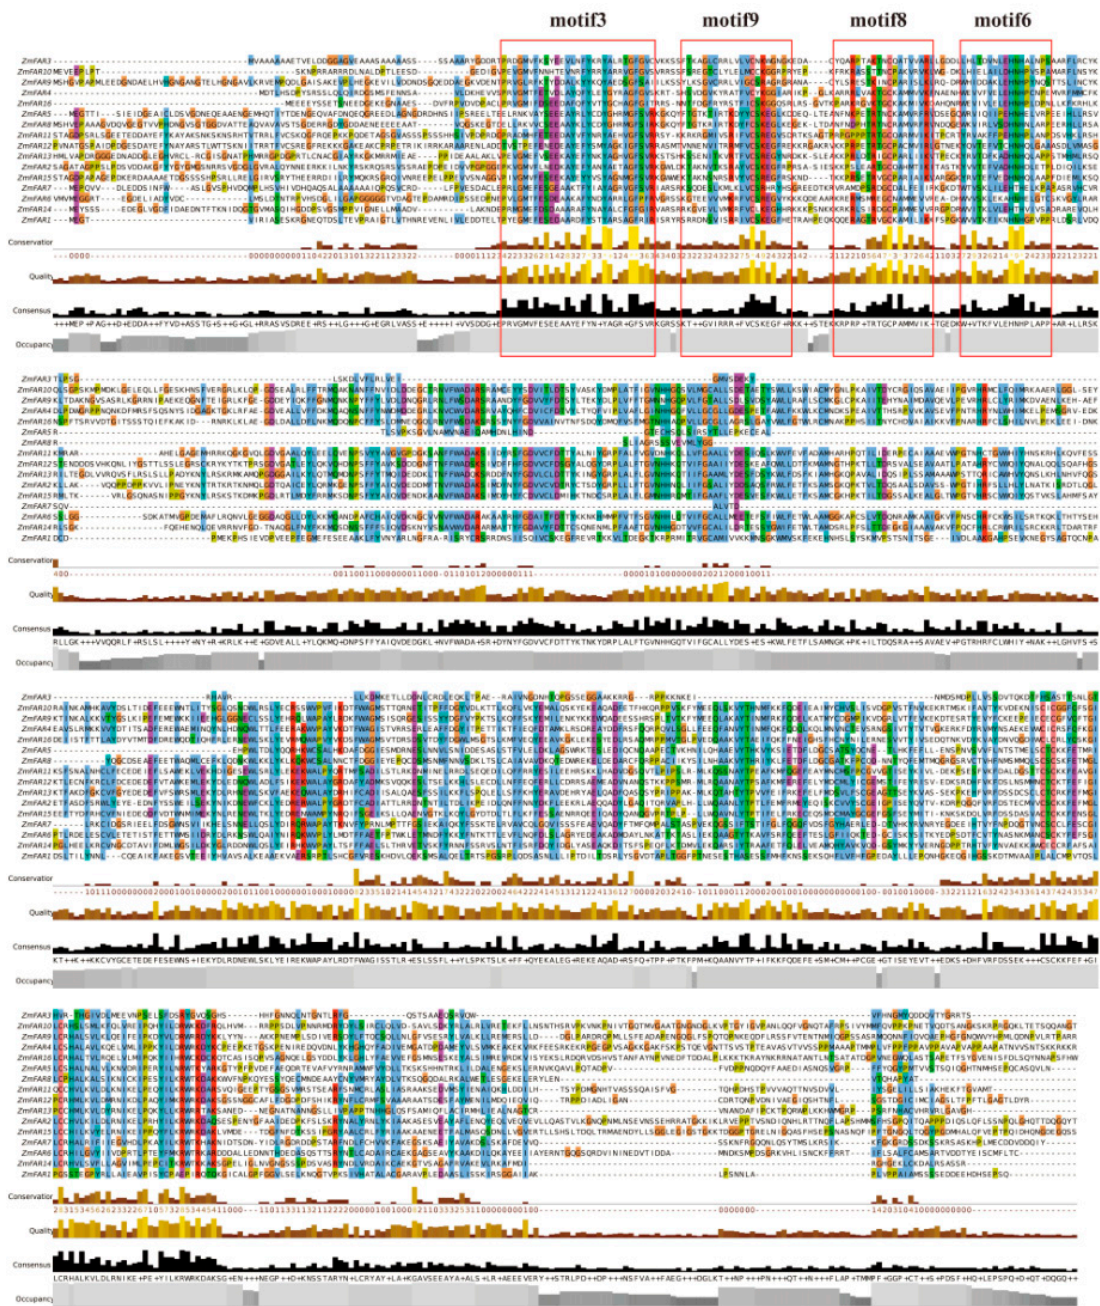

**Supplementary Figure S1.** Multiple sequence alignment results for the ZmFAR1 family members. The FAR1 domains (motif3-motif9-motif8-motif6) were highlighted in red boxes.

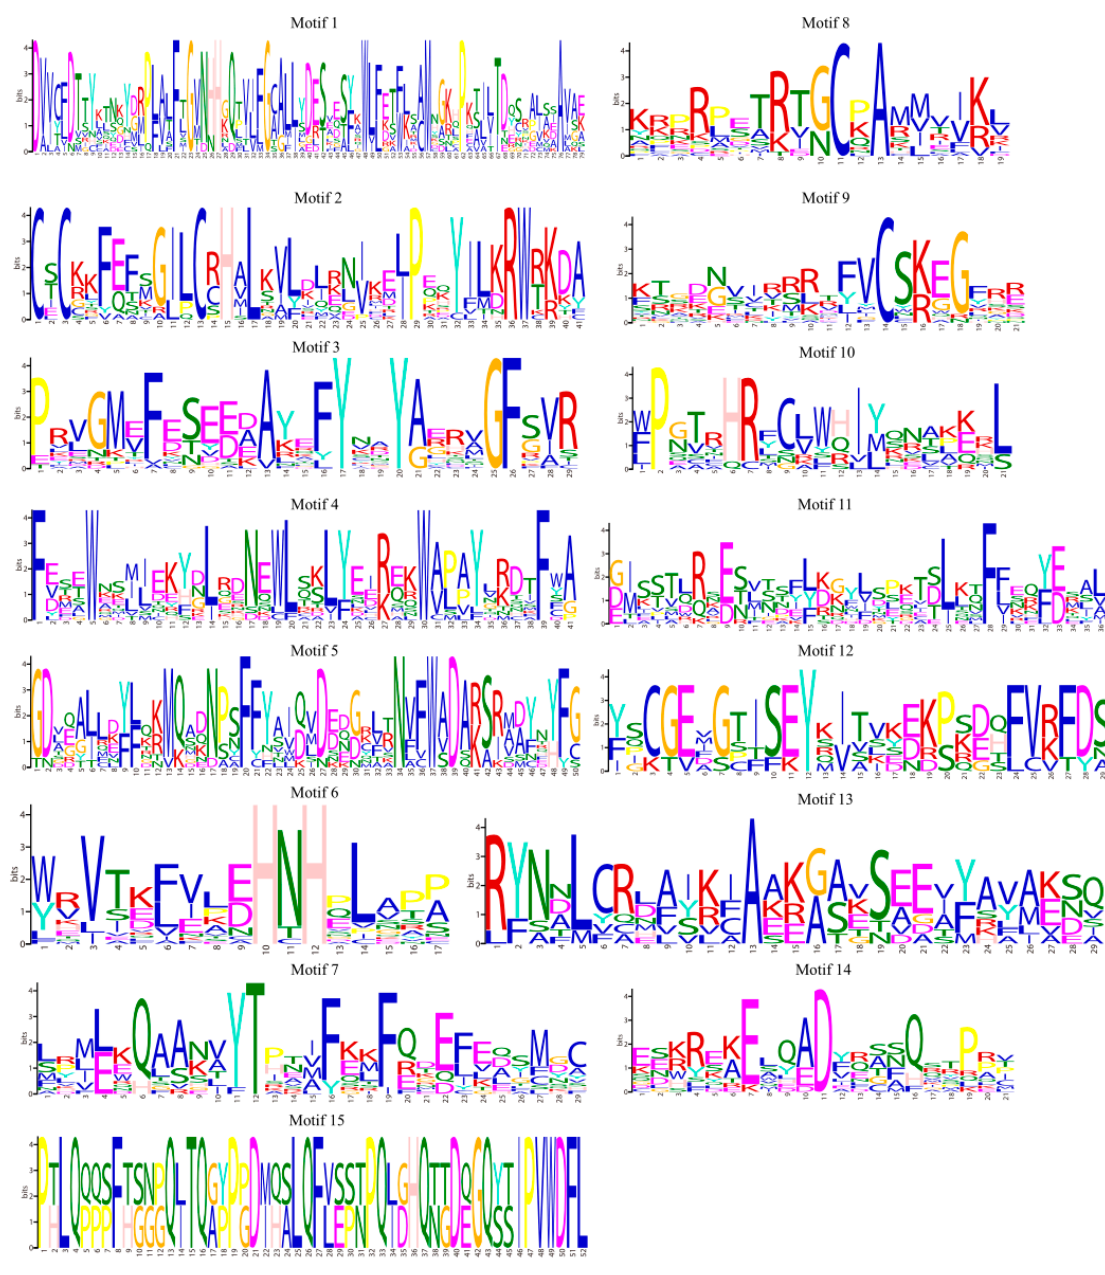

**Supplementary Figure S2.** The sequence logo of all 15 motifs and the base size at each point showed the likelihood that the base occurred there.

**Supplementary Table S1. The protein sequences of 16 *ZmFAR1* genes in maize B73.**

| Gene Locus ID  | Gene Name       | Protein Seq                                                                                                                                                                                                                                                                                                                                                                                                                                                                                                                                                                                                                                                                                                                                                                                                                                                                                                                                                                                                                                                                                                                                                                                                                                                                                                                               |
|----------------|-----------------|-------------------------------------------------------------------------------------------------------------------------------------------------------------------------------------------------------------------------------------------------------------------------------------------------------------------------------------------------------------------------------------------------------------------------------------------------------------------------------------------------------------------------------------------------------------------------------------------------------------------------------------------------------------------------------------------------------------------------------------------------------------------------------------------------------------------------------------------------------------------------------------------------------------------------------------------------------------------------------------------------------------------------------------------------------------------------------------------------------------------------------------------------------------------------------------------------------------------------------------------------------------------------------------------------------------------------------------------|
| Zm00001d028472 | <i>ZmFAR1-1</i> | MEGTVIRIASESKRGNEQTDLSLTVPRAGITLVTHNREVENLIVLEDDTELTPY<br>EGMEFESEDAARDFYSTYARSAGFRIRISRYTRSRRDNSVISRRIVCSKEGFHE<br>TRACDGLHPEQKQKERAGTRVGCKAMILIKKFSPGKWVVTKFIKNHNHGPV<br>PPRKLD SRLVDQDCDPMEKPHSIEVDPVEEPFEGMEFESEEAALKFYVNYAR<br>LNGFRARISRYCRSRRDNSIISRQIVCSKEGFREVRTKKVLTDEGKTKRPRMIT<br>RVGCKAMIVVKMNSGKWMVSKFEKEHNHLSYSKMPSTSNITSGEIVDL<br>AAKGAHPSEVKNEGYSAGTQCNPADSLTILYNNLCQEAIFAKEGSVTEEIY<br>HVAVSALKEAAEKVAEVKRSRPTLSHCGFVRESKHDVLQEKSMSALQCSNQ<br>VELTRTSPGSRPLQDSASNLLIPTDILTDSRLYSGVDTAPLTGGFPTNESESTH<br>ASESSFMHFKNTKKTSSSEKSQHFLVFHFGPEDAYLLEPQNTCFNQLIHGKEQ<br>GIHGSSKDTMVAIPAIPALCMPVTQSLPGSSTEGPYRLLAAPIEAVPISYCPA<br>EPIRQTQKGICALGPFGGVLSELKNQGTVPKSIVHATALACGARAVPLEDAAS<br>LISAIESKIRSGGAIIAKLPSNNLAPLVPPAIAMSSSSEDDDEHDHSEPSQ                                                                                                                                                                                                                                                                                                                                                                                                                                                                                                                                                                                  |
| Zm00001d034282 | <i>ZmFAR1-2</i> | MVDRAAARAQAVSSDPPPPALLEPDPRLSQPGAADGQEVASAGATAGPPSLP<br>QASDAEEDALASPAGQPGERCAMMEVVAKDGAWKVTKLVVEHCHELQV<br>APGHVAVTVPALGMEFDSVDDAKGFYYGYGEQVGFKARMGNSRRSVGDG<br>EKILQRFLCWKGNYANRSRCKDSDAGKETDEVLEGLSAAAGKRKRREPYKTR<br>SRNPGRSTEVIEVEKGVGLGGAGNGLELDNGRRSRRGRSKKAEVEHGEDSV<br>VGFEAEVAKAVSDADEEEDGDEDEQEAQEVEVEVKEQRRARGRPRKAV<br>MEDNALQARVLRELGVRLQYNNNEERKKILNKYRSKRQSRSVSSRPTKISSR<br>QALAERRKRGNGGRFLSSEEQPLPSERRSKRLKKQNLKMQKAESKEDETME<br>AEPDPEIDVVPGGGEPKVGMMVFLNEDKAYEFYANYAETAGFSVRKGWLDK<br>TAKNVTKSRAYYCSKEGFRPRSASIESKKPSLEARTGCQAHMTIKITASTKYV<br>VTEFVADHNHDLTLPVDIQILKSEKLLAKVQPPDPKVVLPNEYKNYTRT<br>KRTKNMQLGDTQAICEYLQRMKGENPSFFYAIQVDEDDMFTNVFWADAKSI<br>MDYNYFGDVVCVDTRYCTSDYGRPLLLFTGVNHHNQLIIFGSALIYDDSAQS<br>FRWLFETFKSAMSGBKQPKTVLTDQSAALSDAVSSWPGTIHRFSLHLHLYNAT<br>KISRDTLQGLETFASDFSRWLYEYEDNFYSSWEILSEKYNIKDNEWFCCKLYE<br>DRERWALPYGRDTFCADIATTLRRDNTNTILTDLIKPEIDLQNFNNYDKFLE<br>EKRLAEQQADYLGAQITQRVAPLHLLWQAANLYTPTLFEMFRMEYEQISKC<br>VVYSCGEIGPISEYQVTVKDRPQGQFVRFDSTECMVVCSCKKFEFMGLLCCH<br>VLKILDRLNIKELPRHYILKRWRKDAQSESPENYGFAAIDEDPKFSLSKRYNA<br>LYRNLYKIAAKASESVEAYAFLENQYEQQLVEQVEVLLQAKLHDKSSLSTVLK<br>GNQPNMLNSEVNSSEHRRATGKKIKNVEVRRQQSLDPNKKKKGRQVLLPE<br>EIEIPLRVEPPTVNSDIQNLRLTTNQFLAPSHMMQAPYVAQQFGLGSLQGFGP<br>MSPFGQIQEPTPLQQPHLQPPSFHSGPQITQAPPPDIQSLQLFLSSNPQLGHQTTD<br>QGQYTIPVWDFL |
| Zm00001d034813 | <i>ZmFAR1-3</i> | MVAAAAAAETVELDDGGAGVEAAAASAAAASSSSAAARYGDDRTPRDGM<br>VFKSYEEVLNFYKRYALRTGFGVCVKSSFTKAGLCRRLVLCNKWGNKG<br>EDACYQARPTAKTNCQATVVARLLGDDLLHLDVNLNHNHALNPSAARFLR<br>CYKTLPSGLSKDLVFLRLVEIGMVSDEKYRHA VRLLDKMDKETLLDDNLCRD<br>LEQKLT PAERIAVNGDNHTQPGSSEGGA AKRRGRPPKKNKEINMDSMDPL<br>LVSSDVTQKDTFHSASTTSLGTHVRTHGIVDLMEEVNPSSELSFDSRYGVQS<br>GHSHHFGNQLNTGNTLRFQGSTAAEQSRVQWVFHNGMYQDDQVTYGRR<br>TS                                                                                                                                                                                                                                                                                                                                                                                                                                                                                                                                                                                                                                                                                                                                                                                                                                                                                                                                            |
| Zm00001d003302 | <i>ZmFAR1-4</i> | MDTLHSDPYSRSSLQLQIRDGSMSEFNNSAVLDKHEVVSPRVGMTFETVDLA<br>YQFYLEYGYRAGFGVSKRTSHSVDGVKYRATFVCYKGGIARIKPGLKARRR<br>LVAKTGCKAMMVVKFNASENHWEVVFVELEHNHPCNPEMVRFMCMCFKDL<br>PDWQREHRFPNAKTRLNPKIHSGRGRPPNQKDFMVRFSFSQSNYSIDGAGKT<br>GKLRF AEGDVEALLVFFDKMQAQNSNFFYNWDMDEGRLKNVCWVDARS<br>RVAYQHFCDVICFDTVYLTYQFVIPLVAFGLINHHGQFVLLGCGLLGDESPET<br>FAWLFFKW LKCMNDKSPEAIVTTHSRPVVKAVSEVFNPTRHRYNLWHIMKE<br>LPEMSGRVEDKEAVSLRMKKVYDITTSADFEREWAEMINQYNLHDNQWL                                                                                                                                                                                                                                                                                                                                                                                                                                                                                                                                                                                                                                                                                                                                                                                                                                                                                      |

|                |          |                                                                                                                                                                                                                                                                                                                                                                                                                                                                                                                                                                                                                                                                                                                                                                                                                                                   |
|----------------|----------|---------------------------------------------------------------------------------------------------------------------------------------------------------------------------------------------------------------------------------------------------------------------------------------------------------------------------------------------------------------------------------------------------------------------------------------------------------------------------------------------------------------------------------------------------------------------------------------------------------------------------------------------------------------------------------------------------------------------------------------------------------------------------------------------------------------------------------------------------|
|                |          | <p>TTLFEERAKWVPAYVKDTFWAGISTVRRSERLEAFFDGYITPETTIKTFIEQFD<br/>TAMKLRSDREAYDDFRSFQQRPOVLSGLLFEEQFANVYTINMFQKFQDQLK<br/>QLMNVNCTEVSRRNGSIVTYTVTVIGKERKFDYRVMYNSAEKEVWCICRSFQ<br/>FKGILCSHALAVLKQELVMLIPPKYILDRWRKDYKCPEEPKETPISQKAAKDT<br/>GKGSKPENIREQVDNLYKHGHQYFADIVEMGATDPDAMEYVLSVMKEAK<br/>EKVRKFEESRKEKRPGEPPVSAGKKGAKFSKPSTQEVGNNTSVSTPTEAVAS<br/>VTVVSSPPMAAAPMTMMAMAPPSAAVAGGMFLVPMHHPHLVFPFPFPAVPPA<br/>VAPVAPPAAPATNVVSNTSKKRKKRKGNN</p>                                                                                                                                                                                                                                                                                                                                                                                                |
| Zm00001d041923 | ZmFAR1-5 | <p>MEGTTISIEIDGEAICLDSVGDNEQEAAENGEMHQTIYTDENGEQVAFDNQE<br/>QGREEDLAGNGEEDRDHNSIIPSREELTEELRNKVAYSEEEAYRLYCDYGHR<br/>MGFSVRKKGKQYYFTGTKTIRTKDYYSKEGLKDDEQLTEANFNKPETRTNC<br/>KAMVRFRVDSEGQWRVIQIPEHNHELVRPEEIHLLRSVRTLSVPKSGVLNA<br/>MVNAEIQAMHDNLHINEDGTECHSLSIRSITLLEPKECEALEHPWLTDLQY<br/>QRHKWCSALHKDAFDGGIESMDRNESSLNVLNIDDESASLSTFVLELDKLA<br/>GSRWKTESLEDIQCNQAAPECTVKHNRILQHAAEVYTHKVYSIETDFLDGC<br/>SATSQAAQCNETLHKFEFLLENSPNVSVVFLNTSTMELSCCKKFETMRILC<br/>SHALNALVLKNVDRIPEYILNRWTKYARKGTYPPVDEFAEQDRTEVAFVY<br/>RNRAMWVYDILLTKSKSHNTRKLLIDALENGEKSLEARNVKQAVLPQTADP<br/>VFVDPPNQDQYFAAEDIASNQSVGRPFYQGYPMTVVSTSQIQGHTNMHSEP<br/>QCASQVLN</p>                                                                                                                                                                                          |
| Zm00001d044646 | ZmFAR1-6 | <p>MVMVMEGGRTEGDELIADYVDCLMSLDTNTRPVHSDGLILGAPGGGGGT<br/>DAGTEPDAMRDIPSEDPNEPVLGMTFESDEAAKAFYNDYARRLGFPFRVGR<br/>SRRSKGTTEEVVVMKRFVCSREGVYKKKQTSPEAARKRERMSMREGCNAM<br/>MEVVREADHWVVSKEKAHNHELGTCSAKVGYLARSSLGGSDDKATMVG<br/>DEMAFLRQNVLGEGGDAQGLLDYLKKMQANDPAFCHAIQVDKNGCVVNV<br/>FWADARAKAAYRHFGDITFDTTYKKNKHMMMPFVTFSGVNHHLQTVIFGC<br/>ALLMEETEFSEFIWLFETWLAAMGGKAPCSLVTQDNRAMKAAIGKVFPNSCH<br/>RFCKWSILSRTKQKLTHYSEHPTLRDELESCVLETETISTFETTWSIIDRYD<br/>LRKNSWLQAIYNIRQKWPLYLMDTFFAETFPWKTLETMNDFYKKYFNTKT<br/>TLEVFLNQFDLSLAGRYEDEAKADMADAYLNKATTKTASLIEKQAAGTYTKA<br/>VFSRFQEEFTESLGFIIQKTEDGCISKYSITKYEDPSDTFCVTYNASNKMANCS<br/>CKYFEFSGILCRHILGVYIIVDPRTLPTIEYFMKRWRTRKARDDDALLEDNNNN<br/>THDEDASQSTTSRYNTLCADAIKCAEKGAGSEAVYKAAKDILQKAYEEIIAY<br/>ERNTGQGSQRDVININEDVTIDDAMNDKSMPDSGRKVHLISNCKFFRRTIFLS<br/>ALFCAMSARTVDDTYEISCMFLTC</p> |
| Zm00001d049493 | ZmFAR1-7 | <p>MEPQVVDLEDDSSINFWASLGVSPHVDQMPLHSVHIVDHQAQSALAAAAAI<br/>QPQSVCRDLFPVESDACLEPRLGMEFESGEAAKTFYIAYAGRVGFSVRIARS<br/>KSKCTRVRQSRKSQDESLKMLKLVCRRHYHSGRESNGEDTKRVRAMDPSR<br/>DGCDALEIIRKKGKDTWTVSKLILEHTELKPPASRVHCVRSQVALVTDLR<br/>KCIDGSRIEELFDGWSNVIIKHELNNELLQSLYDIRQWAPAYTKNVFYPR<br/>NLMPTTFGSIEKAIQKYFSSKTELRAVCQLGQVISSSFEAEVQADYFTMFQM<br/>PALSTASPVEKQGSSIFTSTIFGLFQGGQFVDSFGYHAERLEDDTVHKYRVNRY<br/>EGDEEIHTVYFNPQDQTVNCSCLFESCGILCRHALRIFIIEGVHDLPKAYILK<br/>RWTKHAKNIDTSDNYIDLGRDDPSTARFNDLFCHVVKFAKEGSKSAEIIYA<br/>VAKDSLKAFDEVVQSSKNFRGQQNLQSYTMSLKRSIKFKGGRDSSDKSSK<br/>RSASKHPLMECDVDDQIY</p>                                                                                                                                                                                                                                      |
| Zm00001d016772 | ZmFAR1-8 | <p>MSHVEPAAAGVDQVGEGTVVPHDNGVSGTGGDVATTEAQVAVAVSTSGDE<br/>RRGDYGDAAENEEEEEAATVQGSKEGTDELLRKVVCSSEAAAYKLYCDYGH<br/>RMGFSIRKKGKQSYFTGKTRTKDYFCSKEGLKEGKLTANFNDPHTRTNC<br/>RAMVRFRVNDQGEWKVIRLVSDHNHNLARPEERHLLRSARSLSVSEV<br/>MLYGGYQGCDEAEFEETWAQMLCEFKLQDNKWLLKLYKLKQKWCSALN<br/>NCTFDGGIEYEPQCDMSNMFNNSDKLTSICAIAVAVDKQTEDWREKELD<br/>EDARCFQRPACIIKYSILNHAACKVYTHRIYKLFETDFLDGCGATKFKELPC<br/>QDNNTYQFEMTMQGRGRVCTVHFNMMSMQLSCSCSKFETMGLLCPHALK<br/>ALSIKNICKIPESYILKRWTKDAKKWVFNPKQYESSYQECMNDEAAAYCNYV<br/>MRYAYDLVTKSQGDALRKALWETLESGEKELERYLENVTQHAPYAT</p>                                                                                                                                                                                                                                                                                 |

|                |           |                                                                                                                                                                                                                                                                                                                                                                                                                                                                                                                                                                                                                                                                                                                                                                                                                                                                                                                                                                                                                                     |
|----------------|-----------|-------------------------------------------------------------------------------------------------------------------------------------------------------------------------------------------------------------------------------------------------------------------------------------------------------------------------------------------------------------------------------------------------------------------------------------------------------------------------------------------------------------------------------------------------------------------------------------------------------------------------------------------------------------------------------------------------------------------------------------------------------------------------------------------------------------------------------------------------------------------------------------------------------------------------------------------------------------------------------------------------------------------------------------|
| Zm00001d017164 | ZmFAR1-9  | <p>MSHGVPAPMLEELAREATLADVLSILVDGND AELHVHNGAEVHDNGTELH<br/> GNGAVLKRVE MPQDLGAISAKEVPLHEGKEVILVDDNDSGQEDDAEGKVDE<br/> NTPRVGLRFKTYDDALKYYKQYAEDSGFSAILKSSYLKSGVCRRLVIGCSRA<br/> GRGRANACYLSRESTKINCPARISLKLQRDRWLHIDDAKLEHNHPYNQSTTS<br/> LINCYYKKLTDAKNGVSASRLKGRRNIPAEKEQGNFTEIGRLKFGEGDDEYIQ<br/> KFFGNMQNKNPYFFYLVDLDNQGRRLNLFWS DARSRAANDYFGHDVVYFD<br/> TSYLTEKYDLPLVFFTGMNNHGPVLFGTALLSDLSVDSYAWLLRAFLSCM<br/> KGLCPKAIITEHYNAIMDAVQEVLPEVRHRLCLYRIMKDV AENLKEHAEFKT<br/> INKALKKVTYGSLKIPEFEMEWWKIIIEHGLGGNECLSSLYEHRQLWAPAYL<br/> RDKFWAGMSISQRGESISSYYDGFVYPKTS LKQFFSKYEMILENKYKKEWQA<br/> DEESSHRSP LTVTKFYMEEQLAKAYTINMFRKFQDELKATMYCDGMPIKVD<br/> GRLVTFEVKECSYMEDGKDTESRTYEVYFCKEEPKVEIECECGFVQFTGILCR<br/> HALSVLKLQEIFEIPKDYVLDRWRRDYKKLYYNAKKPNEMPLSDIVERSDYL<br/> FTQCSQLLNLGFVSESRYLVALKLLREMERSLLDDGLPARDRQPMLLSFEAD<br/> APENGQGLFSPQFSEG VKNSQSAHAKRRGRPLKKVTESTDDTVTQPNKEQDF<br/> LRSSFVTENTNMIQGPSSASHLEGPHMGVQGGIDLMDGIPNLSFGNHF GMDI<br/> NHQHQP VNHQRMQQNNFIQVQAEPHGFGNQWVYHPMLQDNPVLRTPARR<br/> AG</p> |
| Zm00001d017165 | ZmFAR1-10 | <p>MEVEEPLPTSKNPRRARRRDLNALDPTLEESDGEDIGVPEVGMVFNNHTEVN<br/> RFYRRYARRVGFVSVRRSSFSREGTCLYLELMCCKGGRPRYEPKFRKRASS<br/> TTNCPAKVRVKLWGDKLLHIELAILDHNHPVSPAMARFLNSYKQLSGPAKR<br/> RLRMGGPGTMPVEESSKMPMDKLGELEQLLFGESKHNSFVERGRKLQPGD<br/> SEALRLFFTRMQAKNANFFNVIDLDDEGCTRN VFWADARSRAMCEYYSDVI<br/> TLDTSYVASKYDMPLATFIGVNHGQSVLMGCALLSDETAETYSWLLKSWI<br/> ACMYGNLPKAIVTDYCRGIQSAVAEII PGVRHRMCLFQIMRKAERLGG LSE<br/> YRAINKAMHKAVYDSL TIDEFEEWNTLITYSGLQSN DWLRSLYECRSSWVP<br/> VFIKDTFWAGMSTTQRNETITPFFDGYVDLKTTLKQFLVKYEMALQSKYEKE<br/> AQADFETFHKQRPPVSKFYMEEQLSKVYTHNMFKKFQDEIEAIMYCHVSLIS<br/> VDGPVSTFNVKECIFEEDGKRTMSKIFAVTYKVDEKNISICGGFQFS GILCRH<br/> SLSMLKFQLVREIPQHYILDRWKKDFRQLHVMRRPPSDLPVNNRMDRYDYL<br/> SIRCLQLVDSAVLSDKYRLALRLVRETEKFLLNSNTHDDTQPRIKSRVPKVNK<br/> PNIVTGQTMVGAATGNGNDGLKGPEATAVTQVPQSQKGGAEEKGIVPTGYIG<br/> VPANLQQFVGNQTAFRPSIVYMVPSGVDPHAFGNVMMPVMYQQMFQVPPK<br/> PNETVQDTSANGKSKRPRGQKLTETSQQANGTPASASG</p>                                                                                     |
| Zm00001d021545 | ZmFAR1-11 | <p>MSTAGDPSRLSGESSPSSSTSSGSSSHSSGAADAAATNLALTAPTSALADDDT<br/> ADAPTSRPRVGT YFETEDDAYEFYKAYAARLGFVVRKSNKSKNSRHTVTRRL<br/> FVCSKQGFREQPKKPQDETAGSGVASSPSLSLVPAPRCPDSRTGCLASLTIKLI<br/> PSANAFRVTD FVADHNHPLASSPAVSLALLSPSSSHHSIVAVASLPDPRDGP<br/> RADMHFETEEDAYVFYNNRYAEHVGF SVRRSYKKRKRGMIVSRIFVCSREGV<br/> SDRTKQEGGAIVIANGGAGSAGTPRPGPPPTRTG CQARMVIKITPCRTYRVAK<br/> FFPEHNHPLANPDSVHKL RSHKMRARAHELGAGEMHRRKQKGQVQLGDVG<br/> AALQYLEELQVENPSVYYAVGVGPDGKSAVNFFWADAKSIIDYRSFGDVVC<br/> FDTTYALNIYGRPFALFVGVDN HKQLLVFGAALLYDESIQSLKWVFEVFADA<br/> MHARHPQTILIDERPECAIAAAEVWPGTNHCTGVWHIYHNSKRHLKQVFESS<br/> KSFSNALNHCLFECEDIEFLSAWEKLVEKHDIGESEWLSRLYLEKEK WALP<br/> YQRTMFSADILSTLRKDNMINELRRDLSEQEDILQFFRRYESILEEHRSKCLH<br/> ADV DGSQVTLPISLRMLKQSSNAYTPEAFKMFQGEFEAYMNCMSFPCGVV<br/> GTISEYKIVLDEKPSFSFVKFDALD GSTTCCKKFEAVGIQCCHVLKVLDLKN<br/> IKELPEQYILKRWRKDARSVQIGEEPTYGSGSVMRSTSEARFSNMCR LASLIA<br/> SRAAKSEDVMSYIESQSNAIQKHLDDILHTSY PDMGNHTVASSQAISFVGTO<br/> HPDHSTPVVVAQTTNVSDVVLISGELILLSIAKHEKFTGVAMT</p>       |
| Zm00001d021799 | ZmFAR1-12 | <p>MPSAPGEKDPQVIPRPATGPPLVQTLTPVNATGSPAIDPRLAQPSWPGHVLL<br/> RPCAAWPPHLPVPLLLPHQNVDALEDVAAADVNP AIDSCDEKMLPKVNMLF<br/> DGESDAYEFYNAYAEKVGFVRRSTLWTT SKNIITRRTFVCSREGFREKKKG<br/> AKEAKCPRPETRIGCPASLTIRLTANGKYRLTEFVPNNHQLASTVHMLK<br/> TKKIRRKARAARENLADDTVSTPEFENEDEAYEFYSMYAGKIGATSVRRASMT<br/> VNNENVITRRMFVCSKEGFREKKRGAKRVKKPRPETRTGCPACMVIRLGTN<br/> EKYQVTEFVTCHNHQLGAAAASDLVMASGSTENDQDDGFDQADRSPDDSV</p>                                                                                                                                                                                                                                                                                                                                                                                                                                                                                                                                                                                                                  |



|                |           |                                                                                                                                                                                                                                                                                                                                                                                                                                                                                                                                                                                                                                                                                                                                                                                                                                                                                                                                                                                                |
|----------------|-----------|------------------------------------------------------------------------------------------------------------------------------------------------------------------------------------------------------------------------------------------------------------------------------------------------------------------------------------------------------------------------------------------------------------------------------------------------------------------------------------------------------------------------------------------------------------------------------------------------------------------------------------------------------------------------------------------------------------------------------------------------------------------------------------------------------------------------------------------------------------------------------------------------------------------------------------------------------------------------------------------------|
|                |           | <p>HKQNLIGSTTLSSLEGRSCKRYKYTKTPRSGDVGATLEYLQKVQHDNPSFF<br/>YAVKSDDDGNFTNFFWADSKSIVDFFHFGDVVCFDSGYALQGYDRPLALFT<br/>GVNHHKQTVIFGAIIYDESKEAFQWLLDTFKMAMNGTHPKTLLTDRSVAL<br/>SEAVAATLPATAHRYCVWQIYQNALQQLSQAFHGSKTLECNFKRCLFDCED<br/>EDEFVTAWKEMLEKYDLEDNQWLADLFSIKEKWALAYGRDAFYADMKSV<br/>QQKESLTSELKKHLSLECDLLNFFEQFERLLCDRRSAEMEADVNNQSTKKP<br/>PSMRMLRQAANAYTPSAFKMFEREFELYMDCMLYICGEMSTIFEYRISVEDK<br/>SRDHFVKFDSLNSMMNCTCKTFEFIGIPCRHMLKVLDMRNIKDLPAQYIMKR<br/>WRKDAKSGSSNGGCAFLDGDPDFSHIKRYNFLCRMFSVAAARAATSDESF<br/>AYMENQSNILMDQIEQVIQTRPPDIADLIGANCDRTQNPVDNIVAEGIQSHTN<br/>FLSGSTDGICIMCIAGSLTFPFTLGAGTLDYR</p>                                                                                                                                                                                                                                                                                                                                                                        |
| Zm00001d022142 | ZmFAR1-13 | <p>MMHMLVAPDRGGGELQPYVAPPAEQELELLRDNADDGLEGHVRLRCGIS<br/>GNATPHMRRGPDGPRTLNCACGIAYRKGMRRMIEAEPPIDEAALAKLVPE<br/>VGMEFVSEEKAYEFYNKYAGHVGFVSRKSTSHKSSENITKVRTFVCSREGYN<br/>RDKKSLEAKKPRLDTRIGCPARLIKVTPHECKYRVTDKADHNNHQLAPPSTM<br/>HMLRSQRILTELQGEAELSDDSVVTPTTKATGDLVVRQVSFLRSLSLPADY<br/>KNYLRSKRMKAMQPGDGGAILKYLQTMQMDNPSFFYTMQIDEDDKLTNFF<br/>WADQKSRDDFNFGDVLCLDTTYKINGYGRPLALFLGVNHHKQTIIFGAAM<br/>LYDESFSYKWLFDSEFKIAMHGKQPAVALIDQSIPLSSAMAAAWPSTTQRIC<br/>AWHVYQNSLKHLNHVFGQSKTFADFGKCVFGYEDEDEFVFSWRSMLEKY<br/>DLRHNEWLSKVFAEKEQWALAYDRHIFCADIISALQAESFSSILKKFLSPQLE<br/>LLSFFKHAYERAVDEHRYAELQADFQASQSYPRIPPAKMLKQTAHTYTPVVFE<br/>IFRKEFELFMDSVLFSCGEAGTTSEYKVASSEKPKHEFVRFDDSSDCSCLCTCR<br/>KFEFMGIPCCHMLKVLDYRNIKELPQKYLLKRWRRTAKSANEDNEGATNA<br/>NNGSLILVPAPPTNHHGLQSFSAMIQFLACIRMHLEALNAGTCRVNANDAFI<br/>PCKTPQRWPLKKHWMGRPPSRFNHACVHRVRLGAVGH</p>                                                                                                                                |
| Zm00001d046441 | ZmFAR1-14 | <p>MEYSSSEDEGLVGDFIDAEDNTFTKNIDQGTGVMAHQIHGDDPSVGSMPPI<br/>GNELLMAADVLAKNDEPRMGMEFDSDAARAFAFYNAALCFGFGIRVARSR<br/>SERRKGVEVLV MKRFVCLKEGHHRKKKPVPEPSNKKKRRLSIRDGCPAMM<br/>EVVRRGPDRAWVITKLVL EHTHVIVSADRAREVQLHRLSGKFQEHENQLQEV<br/>RRNVFGDTNAQGLFNFKKMQSDNSSFFFSIQVDSKNYVSNVWVDARAR<br/>MAYTYFGDAVYFDTTCSQENMLPFAAFTGVNHGDTVVFGCALILDRTES<br/>SYGWIFETWLTAMDSRLPFSLTDEGKGIAAAVAKVFPQCFHRLCRWRILSR<br/>CKKRLTDARTFRPGLHEELKRCVNGCDTAVIFDMLWGSILDKYGLRDDNWL<br/>QSLYEIRHKWVPAYLTSFFF AELSLTHR VETVSKFYRNNFSSRVSLNTFISRFD<br/>QYIDGLYASEAQKDITSFSPEQFLKTD MVLEKQARSYTRAAFETFQLELVEA<br/>MQHYAVKVQDGSYMKYYVERNGDPPTRH TVFYNAEKKAWCECCRFASF<br/>AILCRHVLVSFLLAGVIMLPEPCITKRWTKKAKSGPELIGLNVGNSSPSDSV<br/>ASRYNDLVRDAIKCAEKGTVSAGAFRVAKEVLRKAFMDIRGHGEKLCCKDAL<br/>RSASSR</p>                                                                                                                                                                                                                       |
| Zm00001d026301 | ZmFAR1-15 | <p>MATPSTAGDPAPAGEPVPTPLQGPAQRRISTSRISHIVRTYLDLSSSRKRRSAP<br/>KNQPKAGDKERDAAAETDGSKAGPSSSHPSRLLRELGIRVSRYTHEERRDII<br/>LRYMQKRSRQIVNRAASKVPSRQALAVRRRRRGAGGKFLGKDDAQITDKLE<br/>EKAEEPELPPEVVS NAGGVPIVGMVFESEEKAYEYVSYAGNMGFSVRKG<br/>WWEKTAKNSNRSRVYVCSREGFRSKNDTKKPRSETRVGCARIAIKVARGG<br/>KYRVTEFVEDHNNQLAAPFDIEMLSQRMLTKVRLGSQNASNIPPYKYNL<br/>RSKSTKDMKPGDLRTLMDYFRMRKSDNPSFYIAIQVDENDKAANVFWADA<br/>KSIMDYHYFCDVVCLDMIHKTNDCSRPLALFLGMNHHRQMTIFGAAFLYDE<br/>SVESFKWLLETFKSAMCGKHPKTILTDGSSALKEALGLTWPGTVHRSCVWQI<br/>YQSTVKSLAHMFSAEYEEFTYDFRHCFVNIEDEQDFVDTWNMIMEKYNLREN<br/>EWLTKLYEDRENWAMPYNRQIFSGEIKSLLQAENVGTKLKYLYGDTDLTL<br/>FLKFFESSAENRRQEEIQADYQANQGVPRTPPLLWQAVNLYTPTIFELFRKE<br/>CEQSMDCMAYGCGEFGFSSEYMITIKNKSQDLVRFDDSDASVACTCKKFEN<br/>SGLLCCHILKVYELRNKEIPPQYFLKRWRKDAKLVMDFDTGDNFDTKSSIPG<br/>RYAALCRLFYRIAAKAAENEETFALMASQSDNLLVGVERTLLSTLSDKSSGH<br/>SLTDQLTRMAENDYLLSGGLEGIGSTGKKCEVARRRNGLDTNKRKKAKKGGQ<br/>PDATDGGPTGRELNIGQASFHSEPSNASNQFIPDQLMQGHYVLGHNFPGSS</p> |

HNLHDNLNQFDQASSAPTLQQQPFTGNGQLTQGYPGDMHALQFVEPTPQID  
HQNGDEGQSSIPVWDFL

Zm00001d026485

*ZmFAR1-16*

MEEEEYSSETSNEEDGEKEGNAAESDVFRPVDVDPACLPRVGMIFDSEEDAF  
QFYVTYGCHAGFGITRRSNNTFDGFRYRSTFICKGGQSRLRSGVTKPARKR  
GVKTGCKAKMIVKDAHFNQNRWEVIVLELEHNHPLDPNLLKFKRHLKNSPFTI  
NPPQICESEGQQSNSALVHSSRVVDGTGTSSTQIEFKAKIDNRNKLKLAEGDL  
DALLDLFLNKMQDQNPCFFYSLDMNEQGQLRNVFWSDAKSRSSYNYFGDVV  
AINVTNFSQYDMQFVSFMGTNHHAQPVLLGCGLLAGRSLGAYVWLFGTW  
LRNMNAKPPHSIITNYCHDVAIAIKKVFPNARHRFCLSHILNVLPKLEEDNK  
DEIISTFTTLAYDYVTMTDFDREWQDTIQHFRLERNEWLSKLYEVRMQWAP  
VYVKDSFWAGMSVTDSDSVTDYFDGWLMMSGTSLKMFVEQYEEAVKGKL  
EKESYEDLRSAQMRPPMVTGLPVEDQAAKVYTAEIFQKFFNEIGHSFHCNYN  
ILERNESVVTYIVSEHVDQTNKVVDYKVAYDNVQGDIWCLCRLYQSKGILCR  
HALTVLRQELVLMIPQKYIIHRWCKDCKQTCASISQPVSAQNQELGSYDDL  
KLGHLYFAEVVEFGSMNSESKEYALSIMREVRDKVISYEKSLRDQRVDHSV  
TANFAYNPVNEDFTDDALPISLSTKGWDLTQGGSKRSRKKKLATPTVLDTLK  
KKTKRAYNKRRNATANTLNTSATATDGITDGTNVQNPVNEGWQLASTSAP  
ETFSYGVENISFDLSQYNNAPSFHWPESSRSQLH

---

**Supplementary Table S2. The Cis-acting elements in the promoter regions of ZmFAR1 family members.**

| Gene ID  | Cis-acting element | Sequence    | Information                                                         |
|----------|--------------------|-------------|---------------------------------------------------------------------|
| ZmFAR1-1 | Box 4              | ATTAAT      | part of a conserved DNA module involved in light responsiveness     |
| ZmFAR1-1 | TGACG-motif        | TGACG       | cis-acting regulatory element involved in the MeJA-responsiveness   |
| ZmFAR1-1 | TGACG-motif        | TGACG       | cis-acting regulatory element involved in the MeJA-responsiveness   |
| ZmFAR1-1 | TGA-element        | AACGAC      | auxin-responsive element                                            |
| ZmFAR1-1 | Sp1                | GGGCGG      | light responsive element                                            |
| ZmFAR1-1 | Sp1                | GGGCGG      | light responsive element                                            |
| ZmFAR1-1 | Sp1                | GGGCGG      | light responsive element                                            |
| ZmFAR1-1 | Sp1                | GGGCGG      | light responsive element                                            |
| ZmFAR1-1 | ABRE               | GACACGTACGT | cis-acting element involved in the abscisic acid responsiveness     |
| ZmFAR1-1 | ABRE               | TACGGTC     | cis-acting element involved in the abscisic acid responsiveness     |
| ZmFAR1-1 | TCA-element        | CCATCTTTTT  | cis-acting element involved in salicylic acid responsiveness        |
| ZmFAR1-1 | RY-element         | CATGCATG    | cis-acting regulatory element involved in seed-specific regulation  |
| ZmFAR1-1 | ARE                | AAACCA      | cis-acting regulatory element essential for the anaerobic induction |
| ZmFAR1-1 | ARE                | AAACCA      | cis-acting regulatory element essential for the anaerobic induction |
| ZmFAR1-1 | GATA-motif         | GATAGGG     | part of a light responsive element                                  |
| ZmFAR1-1 | G-box              | CACGAC      | cis-acting regulatory element involved in light responsiveness      |
| ZmFAR1-1 | GC-motif           | CCCCCG      | enhancer-like element involved in anoxic specific inducibility      |
| ZmFAR1-1 | CGTCA-motif        | CGTCA       | cis-acting regulatory element involved in the MeJA-responsiveness   |
| ZmFAR1-1 | CGTCA-motif        | CGTCA       | cis-acting regulatory element involved in the MeJA-responsiveness   |
| ZmFAR1-1 | MBS                | CAACTG      | MYB binding site involved in drought-inducibility                   |
| ZmFAR1-1 | MBS                | CAACTG      | MYB binding site involved in drought-inducibility                   |
| ZmFAR1-1 | MBS                | CAACTG      | MYB binding site involved in drought-inducibility                   |



|          |                 |             |                                                                      |
|----------|-----------------|-------------|----------------------------------------------------------------------|
| ZmFAR1-1 | TCCC-motif      | TCTCCCT     | part of a light responsive element                                   |
| ZmFAR1-2 | ARE             | AAACCA      | cis-acting regulatory element essential for the anaerobic induction  |
| ZmFAR1-2 | ARE             | AAACCA      | cis-acting regulatory element essential for the anaerobic induction  |
| ZmFAR1-2 | ARE             | AAACCA      | cis-acting regulatory element essential for the anaerobic induction  |
| ZmFAR1-2 | ARE             | AAACCA      | cis-acting regulatory element essential for the anaerobic induction  |
| ZmFAR1-2 | I-box           | gGATAAGGTG  | part of a light responsive element                                   |
| ZmFAR1-2 | G-box           | TACGTG      | cis-acting regulatory element involved in light responsiveness       |
| ZmFAR1-2 | ABRE            | ACGTG       | cis-acting element involved in the abscisic acid responsiveness      |
| ZmFAR1-2 | TGA-element     | AACGAC      | auxin-responsive element                                             |
| ZmFAR1-2 | TGA-element     | AACGAC      | auxin-responsive element                                             |
| ZmFAR1-2 | TGA-element     | AACGAC      | auxin-responsive element                                             |
| ZmFAR1-2 | Box 4           | ATTAAT      | part of a conserved DNA module involved in light responsiveness      |
| ZmFAR1-2 | GTGGC-motif     | CATCGTGTGGC | part of a light responsive element                                   |
| ZmFAR1-2 | GT1-motif       | GGTTAA      | light responsive element                                             |
| ZmFAR1-2 | GT1-motif       | GGTTAA      | light responsive element                                             |
| ZmFAR1-2 | GT1-motif       | GGTTAAT     | light responsive element                                             |
| ZmFAR1-2 | GC-motif        | CCCCCG      | enhancer-like element involved in anoxic specific inducibility       |
| ZmFAR1-2 | O2-site         | GATGACATGG  | cis-acting regulatory element involved in zein metabolism regulation |
| ZmFAR1-3 | TC-rich repeats | ATTCTCTAAC  | cis-acting element involved in defense and stress responsiveness     |
| ZmFAR1-3 | TCCC-motif      | TCTCCCT     | part of a light responsive element                                   |
| ZmFAR1-3 | CAT-box         | GCCACT      | cis-acting regulatory element related to meristem expression         |
| ZmFAR1-3 | CAG-motif       | GAAAGGCAGAC | part of a light response element                                     |
| ZmFAR1-3 | O2-site         | GATGACATGG  | cis-acting regulatory element involved in zein metabolism regulation |
| ZmFAR1-3 | GC-motif        | CCCCCG      | enhancer-like element involved in anoxic specific inducibility       |
| ZmFAR1-3 | GC-motif        | CCCCCG      | enhancer-like element involved in anoxic specific inducibility       |

|          |             |                |                                                                     |
|----------|-------------|----------------|---------------------------------------------------------------------|
| ZmFAR1-3 | TCT-motif   | TCTTAC         | part of a light responsive element                                  |
| ZmFAR1-3 | GCN4_motif  | TGAGTCA        | cis-regulatory element involved in endosperm expression             |
| ZmFAR1-3 | ABRE        | ACGTG          | cis-acting element involved in the abscisic acid responsiveness     |
| ZmFAR1-3 | ABRE        | ACGTG          | cis-acting element involved in the abscisic acid responsiveness     |
| ZmFAR1-3 | ABRE        | AACCCGG        | cis-acting element involved in the abscisic acid responsiveness     |
| ZmFAR1-3 | TGA-element | AACGAC         | auxin-responsive element                                            |
| ZmFAR1-3 | GATA-motif  | GATAGGA        | part of a light responsive element                                  |
| ZmFAR1-3 | GATA-motif  | GATAGGA        | part of a light responsive element                                  |
| ZmFAR1-3 | GATA-motif  | GATAGGA        | part of a light responsive element                                  |
| ZmFAR1-3 | GATA-motif  | GATAGGA        | part of a light responsive element                                  |
| ZmFAR1-3 | G-box       | GCCACGTGGA     | cis-acting regulatory element involved in light responsiveness      |
| ZmFAR1-3 | G-box       | TACGTG         | cis-acting regulatory element involved in light responsiveness      |
| ZmFAR1-3 | G-box       | GCCACGTGGA     | cis-acting regulatory element involved in light responsiveness      |
| ZmFAR1-3 | G-box       | TACGTG         | cis-acting regulatory element involved in light responsiveness      |
| ZmFAR1-3 | G-box       | CACGAC         | cis-acting regulatory element involved in light responsiveness      |
| ZmFAR1-3 | ARE         | AAACCA         | cis-acting regulatory element essential for the anaerobic induction |
| ZmFAR1-3 | ARE         | AAACCA         | cis-acting regulatory element essential for the anaerobic induction |
| ZmFAR1-3 | ARE         | AAACCA         | cis-acting regulatory element essential for the anaerobic induction |
| ZmFAR1-3 | ARE         | AAACCA         | cis-acting regulatory element essential for the anaerobic induction |
| ZmFAR1-3 | Box 4       | ATTAAT         | part of a conserved DNA module involved in light responsiveness     |
| ZmFAR1-3 | Box 4       | ATTAAT         | part of a conserved DNA module involved in light responsiveness     |
| ZmFAR1-4 | Gap-box     | CAAATGAA(A/G)A | part of a light responsive element                                  |
| ZmFAR1-4 | ARE         | AAACCA         | cis-acting regulatory element essential for the anaerobic induction |
| ZmFAR1-4 | ARE         | AAACCA         | cis-acting regulatory element essential for the anaerobic induction |
| ZmFAR1-4 | ARE         | AAACCA         | cis-acting regulatory element essential for the anaerobic induction |

|          |                 |            |                                                                     |
|----------|-----------------|------------|---------------------------------------------------------------------|
| ZmFAR1-4 | ARE             | AAACCA     | cis-acting regulatory element essential for the anaerobic induction |
| ZmFAR1-4 | MRE             | AACCTAA    | MYB binding site involved in light responsiveness                   |
| ZmFAR1-4 | TCA-element     | TCAGAAGAGG | cis-acting element involved in salicylic acid responsiveness        |
| ZmFAR1-4 | ABRE            | CGTACGTGCA | cis-acting element involved in the abscisic acid responsiveness     |
| ZmFAR1-4 | TATC-box        | TATCCCA    | cis-acting element involved in gibberellin-responsiveness           |
| ZmFAR1-4 | TATC-box        | TATCCCA    | cis-acting element involved in gibberellin-responsiveness           |
| ZmFAR1-4 | ATCT-motif      | AATCTAATCC | part of a conserved DNA module involved in light responsiveness     |
| ZmFAR1-4 | TGACG-motif     | TGACG      | cis-acting regulatory element involved in the MeJA-responsiveness   |
| ZmFAR1-4 | GA-motif        | ATAGATAA   | part of a light responsive element                                  |
| ZmFAR1-4 | GA-motif        | ATAGATAA   | part of a light responsive element                                  |
| ZmFAR1-4 | ACE             | CTAACGTATT | cis-acting element involved in light responsiveness                 |
| ZmFAR1-4 | MBS             | CAACTG     | MYB binding site involved in drought-inducibility                   |
| ZmFAR1-4 | TCT-motif       | TCTTAC     | part of a light responsive element                                  |
| ZmFAR1-4 | CGTCA-motif     | CGTCA      | cis-acting regulatory element involved in the MeJA-responsiveness   |
| ZmFAR1-4 | GARE-motif      | TCTGTTG    | gibberellin-responsive element                                      |
| ZmFAR1-4 | TC-rich repeats | GTTTCTTAC  | cis-acting element involved in defense and stress responsiveness    |
| ZmFAR1-5 | LTR             | CCGAAA     | cis-acting element involved in low-temperature responsiveness       |
| ZmFAR1-5 | P-box           | CCTTTTG    | gibberellin-responsive element                                      |
| ZmFAR1-5 | GT1-motif       | GGTTAAT    | light responsive element                                            |
| ZmFAR1-5 | ACE             | GACACGTATG | cis-acting element involved in light responsiveness                 |
| ZmFAR1-5 | GA-motif        | ATAGATAA   | part of a light responsive element                                  |
| ZmFAR1-5 | TCT-motif       | TCTTAC     | part of a light responsive element                                  |
| ZmFAR1-5 | TCT-motif       | TCTTAC     | part of a light responsive element                                  |
| ZmFAR1-5 | CGTCA-motif     | CGTCA      | cis-acting regulatory element involved in the MeJA-responsiveness   |
| ZmFAR1-5 | CGTCA-motif     | CGTCA      | cis-acting regulatory element involved in the MeJA-responsiveness   |

|          |             |            |                                                                     |
|----------|-------------|------------|---------------------------------------------------------------------|
| ZmFAR1-5 | GC-motif    | CCCCCG     | enhancer-like element involved in anoxic specific inducibility      |
| ZmFAR1-5 | I-box       | AGATAAGG   | part of a light responsive element                                  |
| ZmFAR1-5 | GATA-motif  | AAGGATAAGG | part of a light responsive element                                  |
| ZmFAR1-5 | G-box       | TACGTG     | cis-acting regulatory element involved in light responsiveness      |
| ZmFAR1-5 | G-box       | TAACACGTAG | cis-acting regulatory element involved in light responsiveness      |
| ZmFAR1-5 | ARE         | AAACCA     | cis-acting regulatory element essential for the anaerobic induction |
| ZmFAR1-5 | ARE         | AAACCA     | cis-acting regulatory element essential for the anaerobic induction |
| ZmFAR1-5 | TCA-element | CCATCTTTTT | cis-acting element involved in salicylic acid responsiveness        |
| ZmFAR1-5 | TCA-element | TCAGAAGAGG | cis-acting element involved in salicylic acid responsiveness        |
| ZmFAR1-5 | TCA-element | CCATCTTTTT | cis-acting element involved in salicylic acid responsiveness        |
| ZmFAR1-5 | ABRE        | ACGTG      | cis-acting element involved in the abscisic acid responsiveness     |
| ZmFAR1-5 | ABRE        | CGTACGTGCA | cis-acting element involved in the abscisic acid responsiveness     |
| ZmFAR1-5 | Sp1         | GGGCGG     | light responsive element                                            |
| ZmFAR1-5 | ATCT-motif  | AATCTAATCC | part of a conserved DNA module involved in light responsiveness     |
| ZmFAR1-5 | TATC-box    | TATCCCA    | cis-acting element involved in gibberellin-responsiveness           |
| ZmFAR1-5 | TGACG-motif | TGACG      | cis-acting regulatory element involved in the MeJA-responsiveness   |
| ZmFAR1-5 | TGACG-motif | TGACG      | cis-acting regulatory element involved in the MeJA-responsiveness   |
| ZmFAR1-6 | TCT-motif   | TCTTAC     | part of a light responsive element                                  |
| ZmFAR1-6 | ACE         | CTAACGTATT | cis-acting element involved in light responsiveness                 |
| ZmFAR1-6 | MBS         | CAACTG     | MYB binding site involved in drought-inducibility                   |
| ZmFAR1-6 | MBS         | CAACTG     | MYB binding site involved in drought-inducibility                   |
| ZmFAR1-6 | MBS         | CAACTG     | MYB binding site involved in drought-inducibility                   |
| ZmFAR1-6 | MBS         | CAACTG     | MYB binding site involved in drought-inducibility                   |
| ZmFAR1-6 | MBS         | CAACTG     | MYB binding site involved in drought-inducibility                   |
| ZmFAR1-6 | MBS         | CAACTG     | MYB binding site involved in drought-inducibility                   |
| ZmFAR1-6 | GC-motif    | CCCCCG     | enhancer-like element involved in anoxic specific inducibility      |

|          |             |            |                                                                      |
|----------|-------------|------------|----------------------------------------------------------------------|
| ZmFAR1-6 | GARE-motif  | TCTGTTG    | gibberellin-responsive element                                       |
| ZmFAR1-6 | LTR         | CCGAAA     | cis-acting element involved in low-temperature responsiveness        |
| ZmFAR1-6 | GT1-motif   | GGTTAA     | light responsive element                                             |
| ZmFAR1-6 | GT1-motif   | GGTTAA     | light responsive element                                             |
| ZmFAR1-6 | GT1-motif   | GGTTAA     | light responsive element                                             |
| ZmFAR1-6 | Box 4       | ATTAAT     | part of a conserved DNA module involved in light responsiveness      |
| ZmFAR1-6 | Box 4       | ATTAAT     | part of a conserved DNA module involved in light responsiveness      |
| ZmFAR1-6 | Box 4       | ATTAAT     | part of a conserved DNA module involved in light responsiveness      |
| ZmFAR1-6 | G-Box       | CACGTG     | cis-acting regulatory element involved in light responsiveness       |
| ZmFAR1-6 | chs-CMA1a   | TTACTTAA   | part of a light responsive element                                   |
| ZmFAR1-6 | G-box       | CACGTG     | cis-acting regulatory element involved in light responsiveness       |
| ZmFAR1-6 | ABRE        | CGCACGTGTC | cis-acting element involved in the abscisic acid responsiveness      |
| ZmFAR1-6 | ABRE        | CACGTG     | cis-acting element involved in the abscisic acid responsiveness      |
| ZmFAR1-6 | ABRE        | ACGTG      | cis-acting element involved in the abscisic acid responsiveness      |
| ZmFAR1-6 | Sp1         | GGGCGG     | light responsive element                                             |
| ZmFAR1-6 | ATCT-motif  | AATCTAATCC | part of a conserved DNA module involved in light responsiveness      |
| ZmFAR1-6 | ATCT-motif  | AATCTAATCC | part of a conserved DNA module involved in light responsiveness      |
| ZmFAR1-7 | GT1-motif   | GGTTAA     | light responsive element                                             |
| ZmFAR1-7 | CGTCA-motif | CGTCA      | cis-acting regulatory element involved in the MeJA-responsiveness    |
| ZmFAR1-7 | CGTCA-motif | CGTCA      | cis-acting regulatory element involved in the MeJA-responsiveness    |
| ZmFAR1-7 | O2-site     | GATGATGTGG | cis-acting regulatory element involved in zein metabolism regulation |
| ZmFAR1-7 | I-box       | cGATAAGGCG | part of a light responsive element                                   |
| ZmFAR1-7 | ARE         | AAACCA     | cis-acting regulatory element essential for the anaerobic induction  |
| ZmFAR1-7 | ARE         | AAACCA     | cis-acting regulatory element essential for the anaerobic induction  |
| ZmFAR1-7 | TCA-element | CCATCTTTTT | cis-acting element involved in salicylic acid responsiveness         |

|          |                 |                |                                                                      |
|----------|-----------------|----------------|----------------------------------------------------------------------|
| ZmFAR1-7 | TCA-element     | CCATCTTTT      | cis-acting element involved in salicylic acid responsiveness         |
| ZmFAR1-7 | TGACG-motif     | TGACG          | cis-acting regulatory element involved in the MeJA-responsiveness    |
| ZmFAR1-7 | TGACG-motif     | TGACG          | cis-acting regulatory element involved in the MeJA-responsiveness    |
| ZmFAR1-7 | ABRE            | GCCGCGTGGC     | cis-acting element involved in the abscisic acid responsiveness      |
| ZmFAR1-7 | TGA-element     | AACGAC         | auxin-responsive element                                             |
| ZmFAR1-7 | Box 4           | ATTAAT         | part of a conserved DNA module involved in light responsiveness      |
| ZmFAR1-8 | GATA-motif      | GATAGGA        | part of a light responsive element                                   |
| ZmFAR1-8 | ARE             | AAACCA         | cis-acting regulatory element essential for the anaerobic induction  |
| ZmFAR1-8 | ARE             | AAACCA         | cis-acting regulatory element essential for the anaerobic induction  |
| ZmFAR1-8 | ARE             | AAACCA         | cis-acting regulatory element essential for the anaerobic induction  |
| ZmFAR1-8 | TGACG-motif     | TGACG          | cis-acting regulatory element involved in the MeJA-responsiveness    |
| ZmFAR1-8 | TGACG-motif     | TGACG          | cis-acting regulatory element involved in the MeJA-responsiveness    |
| ZmFAR1-8 | Sp1             | GGGCGG         | light responsive element                                             |
| ZmFAR1-8 | Box 4           | ATTAAT         | part of a conserved DNA module involved in light responsiveness      |
| ZmFAR1-8 | Gap-box         | CAAATGAA(A/G)A | part of a light responsive element                                   |
| ZmFAR1-8 | TCCC-motif      | TCTCCCT        | part of a light responsive element                                   |
| ZmFAR1-8 | CAT-box         | GCCACT         | cis-acting regulatory element related to meristem expression         |
| ZmFAR1-8 | CAT-box         | GCCACT         | cis-acting regulatory element related to meristem expression         |
| ZmFAR1-8 | GTGGC-motif     | GATTCTGTGGC    | part of a light responsive element                                   |
| ZmFAR1-8 | GT1-motif       | GGTTAA         | light responsive element                                             |
| ZmFAR1-8 | TC-rich repeats | GTTTCTTAC      | cis-acting element involved in defense and stress responsiveness     |
| ZmFAR1-8 | CGTCA-motif     | CGTCA          | cis-acting regulatory element involved in the MeJA-responsiveness    |
| ZmFAR1-8 | CGTCA-motif     | CGTCA          | cis-acting regulatory element involved in the MeJA-responsiveness    |
| ZmFAR1-8 | O2-site         | GATGATGTGG     | cis-acting regulatory element involved in zein metabolism regulation |
| ZmFAR1-9 | TGACG-motif     | TGACG          | cis-acting regulatory element involved in the MeJA-responsiveness    |

|          |             |             |                                                                      |
|----------|-------------|-------------|----------------------------------------------------------------------|
| ZmFAR1-9 | TGACG-motif | TGACG       | cis-acting regulatory element involved in the MeJA-responsiveness    |
| ZmFAR1-9 | TGACG-motif | TGACG       | cis-acting regulatory element involved in the MeJA-responsiveness    |
| ZmFAR1-9 | TGACG-motif | TGACG       | cis-acting regulatory element involved in the MeJA-responsiveness    |
| ZmFAR1-9 | TGACG-motif | TGACG       | cis-acting regulatory element involved in the MeJA-responsiveness    |
| ZmFAR1-9 | TGACG-motif | TGACG       | cis-acting regulatory element involved in the MeJA-responsiveness    |
| ZmFAR1-9 | Sp1         | GGGCGG      | light responsive element                                             |
| ZmFAR1-9 | ABRE        | ACGTG       | cis-acting element involved in the abscisic acid responsiveness      |
| ZmFAR1-9 | ABRE        | ACGTG       | cis-acting element involved in the abscisic acid responsiveness      |
| ZmFAR1-9 | TGA-element | AACGAC      | auxin-responsive element                                             |
| ZmFAR1-9 | G-box       | TACGTG      | cis-acting regulatory element involved in light responsiveness       |
| ZmFAR1-9 | G-box       | CACGTC      | cis-acting regulatory element involved in light responsiveness       |
| ZmFAR1-9 | G-box       | TAACACGTAG  | cis-acting regulatory element involved in light responsiveness       |
| ZmFAR1-9 | chs-CMA1a   | TTACTTAA    | part of a light responsive element                                   |
| ZmFAR1-9 | ARE         | AAACCA      | cis-acting regulatory element essential for the anaerobic induction  |
| ZmFAR1-9 | ARE         | AAACCA      | cis-acting regulatory element essential for the anaerobic induction  |
| ZmFAR1-9 | P-box       | CCTTTTG     | gibberellin-responsive element                                       |
| ZmFAR1-9 | TCCC-motif  | TCTCCCT     | part of a light responsive element                                   |
| ZmFAR1-9 | CAG-motif   | GAAAGGCAGAC | part of a light response element                                     |
| ZmFAR1-9 | O2-site     | GATGATGTGG  | cis-acting regulatory element involved in zein metabolism regulation |
| ZmFAR1-9 | GC-motif    | CCCCCG      | enhancer-like element involved in anoxic specific inducibility       |
| ZmFAR1-9 | CGTCA-motif | CGTCA       | cis-acting regulatory element involved in the MeJA-responsiveness    |
| ZmFAR1-9 | CGTCA-motif | CGTCA       | cis-acting regulatory element involved in the MeJA-responsiveness    |
| ZmFAR1-9 | CGTCA-motif | CGTCA       | cis-acting regulatory element involved in the MeJA-responsiveness    |
| ZmFAR1-9 | CGTCA-motif | CGTCA       | cis-acting regulatory element involved in the MeJA-responsiveness    |
| ZmFAR1-9 | CGTCA-motif | CGTCA       | cis-acting regulatory element involved in the MeJA-responsiveness    |



|           |             |            |                                                                      |
|-----------|-------------|------------|----------------------------------------------------------------------|
| ZmFAR1-9  | CGTCA-motif | CGTCA      | cis-acting regulatory element involved in the MeJA-responsiveness    |
| ZmFAR1-9  | TCT-motif   | TCTTAC     | part of a light responsive element                                   |
| ZmFAR1-10 | TCA-element | CCATCTTTTT | cis-acting element involved in salicylic acid responsiveness         |
| ZmFAR1-10 | TCA-element | CCATCTTTTT | cis-acting element involved in salicylic acid responsiveness         |
| ZmFAR1-10 | TGACG-motif | TGACG      | cis-acting regulatory element involved in the MeJA-responsiveness    |
| ZmFAR1-10 | TGACG-motif | TGACG      | cis-acting regulatory element involved in the MeJA-responsiveness    |
| ZmFAR1-10 | TGACG-motif | TGACG      | cis-acting regulatory element involved in the MeJA-responsiveness    |
| ZmFAR1-10 | Sp1         | GGGCGG     | light responsive element                                             |
| ZmFAR1-10 | ABRE        | ACGTG      | cis-acting element involved in the abscisic acid responsiveness      |
| ZmFAR1-10 | ABRE        | CACGTG     | cis-acting element involved in the abscisic acid responsiveness      |
| ZmFAR1-10 | ABRE        | ACGTG      | cis-acting element involved in the abscisic acid responsiveness      |
| ZmFAR1-10 | ABRE        | ACGTG      | cis-acting element involved in the abscisic acid responsiveness      |
| ZmFAR1-10 | ABRE        | AACCCGG    | cis-acting element involved in the abscisic acid responsiveness      |
| ZmFAR1-10 | G-box       | CCACGTAA   | cis-acting regulatory element involved in light responsiveness       |
| ZmFAR1-10 | G-box       | TACGTG     | cis-acting regulatory element involved in light responsiveness       |
| ZmFAR1-10 | G-box       | CACGTG     | cis-acting regulatory element involved in light responsiveness       |
| ZmFAR1-10 | G-box       | CACGAC     | cis-acting regulatory element involved in light responsiveness       |
| ZmFAR1-10 | G-Box       | CACGTG     | cis-acting regulatory element involved in light responsiveness       |
| ZmFAR1-10 | G-Box       | CACGTT     | cis-acting regulatory element involved in light responsiveness       |
| ZmFAR1-10 | ARE         | AAACCA     | cis-acting regulatory element essential for the anaerobic induction  |
| ZmFAR1-10 | LTR         | CCGAAA     | cis-acting element involved in low-temperature responsiveness        |
| ZmFAR1-10 | LTR         | CCGAAA     | cis-acting element involved in low-temperature responsiveness        |
| ZmFAR1-10 | LTR         | CCGAAA     | cis-acting element involved in low-temperature responsiveness        |
| ZmFAR1-10 | O2-site     | GATGACATGG | cis-acting regulatory element involved in zein metabolism regulation |
| ZmFAR1-10 | ACE         | GACACGTATG | cis-acting element involved in light responsiveness                  |

|           |             |         |                                                                     |
|-----------|-------------|---------|---------------------------------------------------------------------|
| ZmFAR1-10 | MBS         | CAACTG  | MYB binding site involved in drought-inducibility                   |
| ZmFAR1-10 | CGTCA-motif | CGTCA   | cis-acting regulatory element involved in the MeJA-responsiveness   |
| ZmFAR1-10 | CGTCA-motif | CGTCA   | cis-acting regulatory element involved in the MeJA-responsiveness   |
| ZmFAR1-10 | CGTCA-motif | CGTCA   | cis-acting regulatory element involved in the MeJA-responsiveness   |
| ZmFAR1-11 | CGTCA-motif | CGTCA   | cis-acting regulatory element involved in the MeJA-responsiveness   |
| ZmFAR1-11 | CGTCA-motif | CGTCA   | cis-acting regulatory element involved in the MeJA-responsiveness   |
| ZmFAR1-11 | MBS         | CAACTG  | MYB binding site involved in drought-inducibility                   |
| ZmFAR1-11 | GC-motif    | CCCCCG  | enhancer-like element involved in anoxic specific inducibility      |
| ZmFAR1-11 | GARE-motif  | TCTGTTG | gibberellin-responsive element                                      |
| ZmFAR1-11 | CAT-box     | GCCACT  | cis-acting regulatory element related to meristem expression        |
| ZmFAR1-11 | TCCC-motif  | TCTCCCT | part of a light responsive element                                  |
| ZmFAR1-11 | GT1-motif   | GGTTAAT | light responsive element                                            |
| ZmFAR1-11 | GT1-motif   | GGTTAA  | light responsive element                                            |
| ZmFAR1-11 | GT1-motif   | GGTTAA  | light responsive element                                            |
| ZmFAR1-11 | GT1-motif   | GGTTAAT | light responsive element                                            |
| ZmFAR1-11 | GT1-motif   | GGTTAA  | light responsive element                                            |
| ZmFAR1-11 | P-box       | CCTTTTG | gibberellin-responsive element                                      |
| ZmFAR1-11 | ARE         | AAACCA  | cis-acting regulatory element essential for the anaerobic induction |
| ZmFAR1-11 | ARE         | AAACCA  | cis-acting regulatory element essential for the anaerobic induction |
| ZmFAR1-11 | G-box       | TACGTG  | cis-acting regulatory element involved in light responsiveness      |
| ZmFAR1-11 | G-box       | CACGTC  | cis-acting regulatory element involved in light responsiveness      |
| ZmFAR1-11 | TGACG-motif | TGACG   | cis-acting regulatory element involved in the MeJA-responsiveness   |
| ZmFAR1-11 | TGACG-motif | TGACG   | cis-acting regulatory element involved in the MeJA-responsiveness   |
| ZmFAR1-11 | TATC-box    | TATCCCA | cis-acting element involved in gibberellin-responsiveness           |
| ZmFAR1-11 | ABRE        | ACGTG   | cis-acting element involved in the abscisic acid responsiveness     |

|           |             |             |                                                                     |
|-----------|-------------|-------------|---------------------------------------------------------------------|
| ZmFAR1-11 | ABRE        | ACGTG       | cis-acting element involved in the abscisic acid responsiveness     |
| ZmFAR1-11 | TCA-element | TCAGAAGAGG  | cis-acting element involved in salicylic acid responsiveness        |
| ZmFAR1-11 | RY-element  | CATGCATG    | cis-acting regulatory element involved in seed-specific regulation  |
| ZmFAR1-12 | LTR         | CCGAAA      | cis-acting element involved in low-temperature responsiveness       |
| ZmFAR1-12 | GTGGC-motif | CAGCGTGTGGC | part of a light responsive element                                  |
| ZmFAR1-12 | GC-motif    | CCCCCG      | enhancer-like element involved in anoxic specific inducibility      |
| ZmFAR1-12 | TCT-motif   | TCTTAC      | part of a light responsive element                                  |
| ZmFAR1-12 | MBS         | CAACTG      | MYB binding site involved in drought-inducibility                   |
| ZmFAR1-12 | GCN4_motif  | TGAGTCA     | cis-regulatory element involved in endosperm expression             |
| ZmFAR1-12 | ARE         | AAACCA      | cis-acting regulatory element essential for the anaerobic induction |
| ZmFAR1-12 | ARE         | AAACCA      | cis-acting regulatory element essential for the anaerobic induction |
| ZmFAR1-12 | ARE         | AAACCA      | cis-acting regulatory element essential for the anaerobic induction |
| ZmFAR1-12 | ARE         | AAACCA      | cis-acting regulatory element essential for the anaerobic induction |
| ZmFAR1-12 | ARE         | AAACCA      | cis-acting regulatory element essential for the anaerobic induction |
| ZmFAR1-12 | chs-CMA1a   | TTACTTAA    | part of a light responsive element                                  |
| ZmFAR1-12 | G-box       | CACGAC      | cis-acting regulatory element involved in light responsiveness      |
| ZmFAR1-12 | G-box       | TACGTG      | cis-acting regulatory element involved in light responsiveness      |
| ZmFAR1-12 | AuxRR-core  | GGTCCAT     | cis-acting regulatory element involved in auxin responsiveness      |
| ZmFAR1-12 | AuxRR-core  | GGTCCAT     | cis-acting regulatory element involved in auxin responsiveness      |
| ZmFAR1-12 | CAT-box     | GCCACT      | cis-acting regulatory element related to meristem expression        |
| ZmFAR1-12 | CAT-box     | GCCACT      | cis-acting regulatory element related to meristem expression        |
| ZmFAR1-12 | CGTCA-motif | CGTCA       | cis-acting regulatory element involved in the MeJA-responsiveness   |
| ZmFAR1-12 | CGTCA-motif | CGTCA       | cis-acting regulatory element involved in the MeJA-responsiveness   |
| ZmFAR1-12 | CGTCA-motif | CGTCA       | cis-acting regulatory element involved in the MeJA-responsiveness   |
| ZmFAR1-12 | GA-motif    | ATAGATAA    | part of a light responsive element                                  |

|           |                 |            |                                                                   |
|-----------|-----------------|------------|-------------------------------------------------------------------|
| ZmFAR1-12 | ABRE            | ACGTG      | cis-acting element involved in the abscisic acid responsiveness   |
| ZmFAR1-12 | Sp1             | GGGCGG     | light responsive element                                          |
| ZmFAR1-12 | Sp1             | GGGCGG     | light responsive element                                          |
| ZmFAR1-12 | Sp1             | GGGCGG     | light responsive element                                          |
| ZmFAR1-12 | TGACG-motif     | TGACG      | cis-acting regulatory element involved in the MeJA-responsiveness |
| ZmFAR1-12 | TGACG-motif     | TGACG      | cis-acting regulatory element involved in the MeJA-responsiveness |
| ZmFAR1-12 | TGACG-motif     | TGACG      | cis-acting regulatory element involved in the MeJA-responsiveness |
| ZmFAR1-12 | MRE             | AACCTAA    | MYB binding site involved in light responsiveness                 |
| ZmFAR1-12 | Box 4           | ATTAAT     | part of a conserved DNA module involved in light responsiveness   |
| ZmFAR1-13 | GARE-motif      | TCTGTTG    | gibberellin-responsive element                                    |
| ZmFAR1-13 | GARE-motif      | TCTGTTG    | gibberellin-responsive element                                    |
| ZmFAR1-13 | GT1-motif       | GGTTAA     | light responsive element                                          |
| ZmFAR1-13 | TC-rich repeats | GTTTCTTAC  | cis-acting element involved in defense and stress responsiveness  |
| ZmFAR1-13 | TCCC-motif      | TCTCCCT    | part of a light responsive element                                |
| ZmFAR1-13 | CAT-box         | GCCACT     | cis-acting regulatory element related to meristem expression      |
| ZmFAR1-13 | CAT-box         | GCCACT     | cis-acting regulatory element related to meristem expression      |
| ZmFAR1-13 | CAT-box         | GCCACT     | cis-acting regulatory element related to meristem expression      |
| ZmFAR1-13 | AE-box          | AGAAACAA   | part of a module for light response                               |
| ZmFAR1-13 | TGA-element     | AACGAC     | auxin-responsive element                                          |
| ZmFAR1-13 | TGA-element     | AACGAC     | auxin-responsive element                                          |
| ZmFAR1-13 | ABRE            | ACGTG      | cis-acting element involved in the abscisic acid responsiveness   |
| ZmFAR1-13 | ABRE            | ACGTG      | cis-acting element involved in the abscisic acid responsiveness   |
| ZmFAR1-13 | ABRE            | ACGTG      | cis-acting element involved in the abscisic acid responsiveness   |
| ZmFAR1-13 | GATA-motif      | AAGGATAAGG | part of a light responsive element                                |
| ZmFAR1-13 | G-box           | TACGTG     | cis-acting regulatory element involved in light responsiveness    |

|           |             |             |                                                                     |
|-----------|-------------|-------------|---------------------------------------------------------------------|
| ZmFAR1-13 | G-box       | TAACACGTAG  | cis-acting regulatory element involved in light responsiveness      |
| ZmFAR1-13 | G-box       | TACGTG      | cis-acting regulatory element involved in light responsiveness      |
| ZmFAR1-13 | I-box       | GTATAAGGCC  | part of a light responsive element                                  |
| ZmFAR1-13 | ARE         | AAACCA      | cis-acting regulatory element essential for the anaerobic induction |
| ZmFAR1-13 | G-Box       | CACGTT      | cis-acting regulatory element involved in light responsiveness      |
| ZmFAR1-14 | GC-motif    | CCCCCG      | enhancer-like element involved in anoxic specific inducibility      |
| ZmFAR1-14 | CGTCA-motif | CGTCA       | cis-acting regulatory element involved in the MeJA-responsiveness   |
| ZmFAR1-14 | CGTCA-motif | CGTCA       | cis-acting regulatory element involved in the MeJA-responsiveness   |
| ZmFAR1-14 | GT1-motif   | GGTTAA      | light responsive element                                            |
| ZmFAR1-14 | CAT-box     | GCCACT      | cis-acting regulatory element related to meristem expression        |
| ZmFAR1-14 | CAT-box     | GCCACT      | cis-acting regulatory element related to meristem expression        |
| ZmFAR1-14 | CAT-box     | GCCACT      | cis-acting regulatory element related to meristem expression        |
| ZmFAR1-14 | MRE         | AACCTAA     | MYB binding site involved in light responsiveness                   |
| ZmFAR1-14 | ATCT-motif  | AATCTAATCC  | part of a conserved DNA module involved in light responsiveness     |
| ZmFAR1-14 | TGACG-motif | TGACG       | cis-acting regulatory element involved in the MeJA-responsiveness   |
| ZmFAR1-14 | TGACG-motif | TGACG       | cis-acting regulatory element involved in the MeJA-responsiveness   |
| ZmFAR1-14 | ABRE        | GCAACGTGTC  | cis-acting element involved in the abscisic acid responsiveness     |
| ZmFAR1-14 | Sp1         | GGGCGG      | light responsive element                                            |
| ZmFAR1-14 | Sp1         | GGGCGG      | light responsive element                                            |
| ZmFAR1-14 | Sp1         | GGGCGG      | light responsive element                                            |
| ZmFAR1-14 | Sp1         | GGGCGG      | light responsive element                                            |
| ZmFAR1-14 | Sp1         | GGGCGG      | light responsive element                                            |
| ZmFAR1-14 | GATA-motif  | AAGGATAAGG  | part of a light responsive element                                  |
| ZmFAR1-14 | GATA-motif  | AAGATAAGATT | part of a light responsive element                                  |
| ZmFAR1-14 | G-box       | CACGAC      | cis-acting regulatory element involved in light responsiveness      |

|           |             |                        |                                                                      |
|-----------|-------------|------------------------|----------------------------------------------------------------------|
| ZmFAR1-14 | ARE         | AAACCA                 | cis-acting regulatory element essential for the anaerobic induction  |
| ZmFAR1-15 | TGACG-motif | TGACG                  | cis-acting regulatory element involved in the MeJA-responsiveness    |
| ZmFAR1-15 | ABRE        | ACGTG                  | cis-acting element involved in the abscisic acid responsiveness      |
| ZmFAR1-15 | ABRE        | ACGTG                  | cis-acting element involved in the abscisic acid responsiveness      |
| ZmFAR1-15 | AE-box      | AGAAACAA               | part of a module for light response                                  |
| ZmFAR1-15 | AE-box      | AGAAACAA               | part of a module for light response                                  |
| ZmFAR1-15 | AE-box      | AGAAACAA               | part of a module for light response                                  |
| ZmFAR1-15 | Box 4       | ATTAAT                 | part of a conserved DNA module involved in light responsiveness      |
| ZmFAR1-15 | CAT-box     | GCCACT                 | cis-acting regulatory element related to meristem expression         |
| ZmFAR1-15 | GARE-motif  | TCTGTTG                | gibberellin-responsive element                                       |
| ZmFAR1-15 | CGTCA-motif | CGTCA                  | cis-acting regulatory element involved in the MeJA-responsiveness    |
| ZmFAR1-15 | TATC-box    | TATCCCA                | cis-acting element involved in gibberellin-responsiveness            |
| ZmFAR1-15 | TGA-element | AACGAC                 | auxin-responsive element                                             |
| ZmFAR1-15 | GATA-motif  | GATAGGG                | part of a light responsive element                                   |
| ZmFAR1-15 | G-box       | TACGTG                 | cis-acting regulatory element involved in light responsiveness       |
| ZmFAR1-15 | G-box       | CCACGTAA               | cis-acting regulatory element involved in light responsiveness       |
| ZmFAR1-15 | G-box       | TACGTG                 | cis-acting regulatory element involved in light responsiveness       |
| ZmFAR1-15 | chs-CMA1a   | TTACTTAA               | part of a light responsive element                                   |
| ZmFAR1-15 | I-box       | gGATAAGGTG             | part of a light responsive element                                   |
| ZmFAR1-15 | ARE         | AAACCA                 | cis-acting regulatory element essential for the anaerobic induction  |
| ZmFAR1-15 | GT1-motif   | GGTTAA                 | light responsive element                                             |
| ZmFAR1-15 | LTR         | CCGAAA                 | cis-acting element involved in low-temperature responsiveness        |
| ZmFAR1-15 | O2-site     | GATGA(C/T)(A/G)TG(A/G) | cis-acting regulatory element involved in zein metabolism regulation |
| ZmFAR1-15 | ACE         | CTAACGTATT             | cis-acting element involved in light responsiveness                  |
| ZmFAR1-15 | MBS         | CAACTG                 | MYB binding site involved in drought-inducibility                    |

|           |             |             |                                                                     |
|-----------|-------------|-------------|---------------------------------------------------------------------|
| ZmFAR1-15 | MBS         | CAACTG      | MYB binding site involved in drought-inducibility                   |
| ZmFAR1-15 | MBS         | CAACTG      | MYB binding site involved in drought-inducibility                   |
| ZmFAR1-16 | ACE         | GACACGTATG  | cis-acting element involved in light responsiveness                 |
| ZmFAR1-16 | MBS         | CAACTG      | MYB binding site involved in drought-inducibility                   |
| ZmFAR1-16 | MBS         | CAACTG      | MYB binding site involved in drought-inducibility                   |
| ZmFAR1-16 | GC-motif    | CCCCCG      | enhancer-like element involved in anoxic specific inducibility      |
| ZmFAR1-16 | TCCC-motif  | TCTCCCT     | part of a light responsive element                                  |
| ZmFAR1-16 | GT1-motif   | GGTTAAT     | light responsive element                                            |
| ZmFAR1-16 | GT1-motif   | GGTTAA      | light responsive element                                            |
| ZmFAR1-16 | LTR         | CCGAAA      | cis-acting element involved in low-temperature responsiveness       |
| ZmFAR1-16 | GATA-motif  | GATAGGA     | part of a light responsive element                                  |
| ZmFAR1-16 | G-box       | TAACACGTAG  | cis-acting regulatory element involved in light responsiveness      |
| ZmFAR1-16 | G-box       | TACGTG      | cis-acting regulatory element involved in light responsiveness      |
| ZmFAR1-16 | G-box       | CAGACGTGGCA | cis-acting regulatory element involved in light responsiveness      |
| ZmFAR1-16 | G-box       | CACGTC      | cis-acting regulatory element involved in light responsiveness      |
| ZmFAR1-16 | ARE         | AAACCA      | cis-acting regulatory element essential for the anaerobic induction |
| ZmFAR1-16 | GCN4_motif  | TGAGTCA     | cis-regulatory element involved in endosperm expression             |
| ZmFAR1-16 | CGTCA-motif | CGTCA       | cis-acting regulatory element involved in the MeJA-responsiveness   |
| ZmFAR1-16 | GARE-motif  | TCTGTTG     | gibberellin-responsive element                                      |
| ZmFAR1-16 | CAT-box     | GCCACT      | cis-acting regulatory element related to meristem expression        |
| ZmFAR1-16 | AuxRR-core  | GGTCCAT     | cis-acting regulatory element involved in auxin responsiveness      |
| ZmFAR1-16 | Box 4       | ATTAAT      | part of a conserved DNA module involved in light responsiveness     |
| ZmFAR1-16 | Box 4       | ATTAAT      | part of a conserved DNA module involved in light responsiveness     |
| ZmFAR1-16 | TGACG-motif | TGACG       | cis-acting regulatory element involved in the MeJA-responsiveness   |
| ZmFAR1-16 | Sp1         | GGGCGG      | light responsive element                                            |



|           |      |       |                                                                 |
|-----------|------|-------|-----------------------------------------------------------------|
| ZmFAR1-16 | ABRE | ACGTG | cis-acting element involved in the abscisic acid responsiveness |
| ZmFAR1-16 | ABRE | ACGTG | cis-acting element involved in the abscisic acid responsiveness |

**Supplementary Table S3.** The interactions between miRNAs and putative target *ZmFAR1* genes

| miRNA_Acc. | Target_Acc.     | Expect<br>ation | UPE<br>\$ | miR<br>NA_<br>start | miR<br>NA_<br>end | Targ<br>et_st<br>art | Targe<br>t_end | miRNA_align<br>ed_fragment    | alignment       | Target_align<br>ed_fragment   | Inhibition | Target_Desc.          | Mult<br>iplic<br>ity |
|------------|-----------------|-----------------|-----------|---------------------|-------------------|----------------------|----------------|-------------------------------|-----------------|-------------------------------|------------|-----------------------|----------------------|
| miR156a-5p | <i>ZmFAR1-5</i> | 3               | -1        | 1                   | 20                | 2715                 | 2734           | UGACAGAA<br>GAGAGUGA<br>GCAC  | .....<br>:::    | UUGCUUA<br>CUCUUUU<br>CUUUUA  | Cleavage   | reverse<br>complement | 1                    |
| miR156b-5p | <i>ZmFAR1-5</i> | 3               | -1        | 1                   | 20                | 2715                 | 2734           | UGACAGAA<br>GAGAGUGA<br>GCAC  | .....<br>:::    | UUGCUUA<br>CUCUUUU<br>CUUUUA  | Cleavage   | reverse<br>complement | 1                    |
| miR156c    | <i>ZmFAR1-5</i> | 3               | -1        | 1                   | 20                | 2715                 | 2734           | UGACAGAA<br>GAGAGUGA<br>GCAC  | .....<br>:::    | UUGCUUA<br>CUCUUUU<br>CUUUUA  | Cleavage   | reverse<br>complement | 1                    |
| miR156d-5p | <i>ZmFAR1-5</i> | 3               | -1        | 1                   | 20                | 2715                 | 2734           | UGACAGAA<br>GAGAGUGA<br>GCAC  | .....<br>:::    | UUGCUUA<br>CUCUUUU<br>CUUUUA  | Cleavage   | reverse<br>complement | 1                    |
| miR156e-5p | <i>ZmFAR1-5</i> | 3               | -1        | 1                   | 20                | 2715                 | 2734           | UGACAGAA<br>GAGAGUGA<br>GCAC  | .....<br>:::    | UUGCUUA<br>CUCUUUU<br>CUUUUA  | Cleavage   | reverse<br>complement | 1                    |
| miR156f-5p | <i>ZmFAR1-5</i> | 3               | -1        | 1                   | 20                | 2715                 | 2734           | UGACAGAA<br>GAGAGUGA<br>GCAC  | .....<br>:::    | UUGCUUA<br>CUCUUUU<br>CUUUUA  | Cleavage   | reverse<br>complement | 1                    |
| miR156g-5p | <i>ZmFAR1-5</i> | 3               | -1        | 1                   | 20                | 2715                 | 2734           | UGACAGAA<br>GAGAGUGA<br>GCAC  | .....<br>:::    | UUGCUUA<br>CUCUUUU<br>CUUUUA  | Cleavage   | reverse<br>complement | 1                    |
| miR156h-5p | <i>ZmFAR1-5</i> | 3               | -1        | 1                   | 20                | 2715                 | 2734           | UGACAGAA<br>GAGAGUGA<br>GCAC  | .....<br>:::    | UUGCUUA<br>CUCUUUU<br>CUUUUA  | Cleavage   | reverse<br>complement | 1                    |
| miR156i-5p | <i>ZmFAR1-5</i> | 3               | -1        | 1                   | 20                | 2715                 | 2734           | UGACAGAA<br>GAGAGUGA<br>GCAC  | .....<br>:::    | UUGCUUA<br>CUCUUUU<br>CUUUUA  | Cleavage   | reverse<br>complement | 1                    |
| miR156l-5p | <i>ZmFAR1-5</i> | 3               | -1        | 1                   | 20                | 2715                 | 2734           | UGACAGAA<br>GAGAGUGA<br>GCAC  | .....<br>:::    | UUGCUUA<br>CUCUUUU<br>CUUUUA  | Cleavage   | reverse<br>complement | 1                    |
| miR160a-3p | <i>ZmFAR1-2</i> | 3               | -1        | 1                   | 21                | 2527                 | 2547           | GCGUGCAA<br>GGGGCCAA<br>GCAUG | :::.....<br>::: | UCUUCAU<br>GGCCUUU<br>UGCAUGC | Cleavage   | reverse<br>complement | 1                    |
| miR160a-5p | <i>ZmFAR1-2</i> | 3               | -1        | 1                   | 21                | 6766                 | 6786           | UGCCUGGC<br>UCCUGUA<br>UGCCA  | .....<br>:::    | ACGCAUG<br>CACGGGG<br>CCAGGCG | Cleavage   | reverse<br>complement | 1                    |
| miR160b-5p | <i>ZmFAR1-2</i> | 3               | -1        | 1                   | 21                | 6766                 | 6786           | UGCCUGGC<br>UCCUGUA<br>UGCCA  | .....<br>:::    | ACGCAUG<br>CACGGGG<br>CCAGGCG | Cleavage   | reverse<br>complement | 1                    |
| miR160c-5p | <i>ZmFAR1-2</i> | 3               | -1        | 1                   | 21                | 6766                 | 6786           | UGCCUGGC<br>UCCUGUA<br>UGCCA  | .....<br>:::    | ACGCAUG<br>CACGGGG<br>CCAGGCG | Cleavage   | reverse<br>complement | 1                    |

|            |                  |     |    |   |    |      |      |                                 |  |                                     |          |                       |   |
|------------|------------------|-----|----|---|----|------|------|---------------------------------|--|-------------------------------------|----------|-----------------------|---|
| miR160d-5p | <i>ZmFAR1-2</i>  | 3   | -1 | 1 | 21 | 6766 | 6786 | UGCCUGGC<br>UCCCUGUA<br>UGCCA   |  | ACGCAUG<br>CACGGGG<br>CCAGGCG       | Cleavage | reverse<br>complement | 1 |
| miR160e    | <i>ZmFAR1-2</i>  | 3   | -1 | 1 | 21 | 6766 | 6786 | UGCCUGGC<br>UCCCUGUA<br>UGCCA   |  | ACGCAUG<br>CACGGGG<br>CCAGGCG       | Cleavage | reverse<br>complement | 1 |
| miR160f-5p | <i>ZmFAR1-2</i>  | 3   | -1 | 1 | 21 | 6766 | 6786 | UGCCUGGC<br>UCCCUGUA<br>UGCCG   |  | ACGCAUG<br>CACGGGG<br>CCAGGCG       | Cleavage | reverse<br>complement | 1 |
| miR160g-5p | <i>ZmFAR1-2</i>  | 3   | -1 | 1 | 21 | 6766 | 6786 | UGCCUGGC<br>UCCCUGUA<br>UGCCA   |  | ACGCAUG<br>CACGGGG<br>CCAGGCG       | Cleavage | reverse<br>complement | 1 |
| miR159e-3p | <i>ZmFAR1-9</i>  | 3.5 | -1 | 1 | 21 | 4627 | 4647 | AUUGGUUU<br>GAAGGGAG<br>CUCCA   |  | CGGAGCU<br>CAUUUCA<br>AAUUGAU       | Cleavage |                       | 1 |
| miR168a-3p | <i>ZmFAR1-8</i>  | 3.5 | -1 | 1 | 20 | 626  | 645  | CCC GCCUU<br>GCACCAAG<br>UGAA   |  | GUUAUCA<br>GGUGCAA<br>GGUGGG        | Cleavage | reverse<br>complement | 1 |
| miR396a-3p | <i>ZmFAR1-11</i> | 3.5 | -1 | 1 | 21 | 2648 | 2668 | GUUCAUA<br>AAGCUGUG<br>GGAAA    |  | AUUUUUA<br>CCGCUUU<br>AUUGAAU       | Cleavage |                       | 1 |
| miR396b-3p | <i>ZmFAR1-11</i> | 3.5 | -1 | 1 | 21 | 2648 | 2668 | GUUCAUA<br>AAGCUGUG<br>GGAAA    |  | AUUUUUA<br>CCGCUUU<br>AUUGAAU       | Cleavage |                       | 1 |
| miR827-5p  | <i>ZmFAR1-5</i>  | 3.5 | -1 | 1 | 21 | 947  | 967  | UUUGUUG<br>UGGUAUU<br>UAACC     |  | GUUUGAA<br>CAACCAC<br>CGACAAA       | Cleavage | reverse<br>complement | 1 |
| miR156j-5p | <i>ZmFAR1-5</i>  | 4   | -1 | 1 | 21 | 2714 | 2734 | UGACAGAA<br>GAGAGAGA<br>GCACA   |  | AUUGCUU<br>ACUCUUU<br>UCUUUUA       | Cleavage | reverse<br>complement | 1 |
| miR156k-5p | <i>ZmFAR1-5</i>  | 4   | -1 | 1 | 20 | 2715 | 2734 | UGACAGAA<br>GAGAGCGA<br>GCAC    |  | UUGCUUA<br>CUCUUUU<br>CUUUUA        | Cleavage | reverse<br>complement | 1 |
| miR166b-5p | <i>ZmFAR1-15</i> | 4   | -1 | 1 | 21 | 1350 | 1370 | GGAAUGUU<br>GUCUGGUU<br>CAAGG   |  | GGUUUUA<br>CUAGACA<br>ACAUUUG       | Cleavage | reverse<br>complement | 1 |
| miR166d-5p | <i>ZmFAR1-15</i> | 4   | -1 | 1 | 21 | 1350 | 1370 | GGAAUGUU<br>GUCUGGUU<br>CAAGG   |  | GGUUUUA<br>CUAGACA<br>ACAUUUG       | Cleavage | reverse<br>complement | 1 |
| miR166g-5p | <i>ZmFAR1-15</i> | 4   | -1 | 1 | 21 | 1350 | 1370 | GGAAUGUU<br>GUCUGGUU<br>GGAGA   |  | GGUUUUA<br>CUAGACA<br>ACAUUUG       | Cleavage | reverse<br>complement | 2 |
| miR167a-5p | <i>ZmFAR1-12</i> | 4   | -1 | 1 | 21 | 3486 | 3506 | UGAAGCUG<br>CCAGCAUG<br>AUCUA   |  | ACUAAUG<br>UGUUGGU<br>AGCUUCA       | Cleavage |                       | 1 |
| miR167b-3p | <i>ZmFAR1-9</i>  | 4   | -1 | 1 | 23 | 4051 | 4073 | GAUCAUGC<br>UGUGACAG<br>UUUCACU |  | UUUAACA<br>CUGUCAC<br>AGCGAGA<br>UG | Cleavage |                       | 1 |

|             |                  |   |    |   |    |      |      |                                |                                                                                      |                                     |          |                    |   |
|-------------|------------------|---|----|---|----|------|------|--------------------------------|--------------------------------------------------------------------------------------|-------------------------------------|----------|--------------------|---|
| miR167b-5p  | <i>ZmFAR1-12</i> | 4 | -1 | 1 | 21 | 3486 | 3506 | UGAAGCUG<br>CCAGCAUG<br>AUCUA  |    | ACUAAUG<br>UGUUGGU<br>AGCUUCA       | Cleavage |                    | 1 |
| miR167c-5p  | <i>ZmFAR1-12</i> | 4 | -1 | 1 | 21 | 3486 | 3506 | UGAAGCUG<br>CCAGCAUG<br>AUCUA  |    | ACUAAUG<br>UGUUGGU<br>AGCUUCA       | Cleavage |                    | 1 |
| miR167d-5p  | <i>ZmFAR1-12</i> | 4 | -1 | 1 | 21 | 3486 | 3506 | UGAAGCUG<br>CCAGCAUG<br>AUCUA  |    | ACUAAUG<br>UGUUGGU<br>AGCUUCA       | Cleavage |                    | 1 |
| miR167e-5p  | <i>ZmFAR1-12</i> | 4 | -1 | 1 | 21 | 3486 | 3506 | UGAAGCUG<br>CCAGCAUG<br>AUCUG  |    | ACUAAUG<br>UGUUGGU<br>AGCUUCA       | Cleavage |                    | 1 |
| miR167f-5p  | <i>ZmFAR1-12</i> | 4 | -1 | 1 | 21 | 3486 | 3506 | UGAAGCUG<br>CCAGCAUG<br>AUCUG  |    | ACUAAUG<br>UGUUGGU<br>AGCUUCA       | Cleavage |                    | 1 |
| miR167g-5p  | <i>ZmFAR1-12</i> | 4 | -1 | 1 | 21 | 3486 | 3506 | UGAAGCUG<br>CCAGCAUG<br>AUCUG  |    | ACUAAUG<br>UGUUGGU<br>AGCUUCA       | Cleavage |                    | 1 |
| miR167h-5p  | <i>ZmFAR1-12</i> | 4 | -1 | 1 | 21 | 3486 | 3506 | UGAAGCUG<br>CCAGCAUG<br>AUCUG  |    | ACUAAUG<br>UGUUGGU<br>AGCUUCA       | Cleavage |                    | 1 |
| miR167i-5p  | <i>ZmFAR1-12</i> | 4 | -1 | 1 | 21 | 3486 | 3506 | UGAAGCUG<br>CCAGCAUG<br>AUCUG  |  | ACUAAUG<br>UGUUGGU<br>AGCUUCA       | Cleavage |                    | 1 |
| miR167j-5p  | <i>ZmFAR1-12</i> | 4 | -1 | 1 | 21 | 3486 | 3506 | UGAAGCUG<br>CCAGCAUG<br>AUCUG  |  | ACUAAUG<br>UGUUGGU<br>AGCUUCA       | Cleavage |                    | 1 |
| miR168b-3p  | <i>ZmFAR1-8</i>  | 4 | -1 | 1 | 20 | 626  | 645  | CCC GCCUU<br>GCAUCAAG<br>UGAA  |  | GUUAUCA<br>GGUGCAA<br>GGUGGG        | Cleavage | reverse complement | 1 |
| miR2275c-5p | <i>ZmFAR1-4</i>  | 4 | -1 | 1 | 21 | 5570 | 5590 | AGGAUUAG<br>AGGGACUU<br>GAACC  |  | UUUUCAC<br>AUCUUUC<br>UGAUCUU       | Cleavage | reverse complement | 1 |
| miR395m-5p  | <i>ZmFAR1-12</i> | 4 | -1 | 1 | 22 | 2547 | 2568 | GUUCCUUU<br>CAAACACU<br>UCACAU |  | CUUUAAA<br>AUGUUUG<br>AGAGGGGA<br>A | Cleavage |                    | 1 |
| miR398a-5p  | <i>ZmFAR1-4</i>  | 4 | -1 | 1 | 21 | 6091 | 6111 | GGGGCGAA<br>CUGAGAAC<br>ACAUG  |  | UCUCUUU<br>UCUCAGU<br>UCUCCCU       | Cleavage | reverse complement | 1 |
| miR399b-5p  | <i>ZmFAR1-13</i> | 4 | -1 | 1 | 21 | 325  | 345  | GUGCAGCU<br>CUCCUCUG<br>GCAUG  |  | AGGGGCG<br>GAGGGGA<br>GCUGCAG       | Cleavage |                    | 1 |
| miR399f-3p  | <i>ZmFAR1-8</i>  | 4 | -1 | 1 | 21 | 849  | 869  | UGCCAAAG<br>GAAUUUG<br>CCCCG   |  | GAUGACU<br>AAUUUCU<br>UUUGGCG       | Cleavage | reverse complement | 1 |
| miR482-3p   | <i>ZmFAR1-10</i> | 4 | -1 | 1 | 20 | 3851 | 3870 | UCUCCUUU<br>GUUCCUCC<br>CAUU   |  | AUUGGGA<br>GGAGCAA<br>AGGAGG        | Cleavage |                    | 2 |

|            |                  |     |    |   |    |      |      |                                |  |                                     |                 |                       |   |
|------------|------------------|-----|----|---|----|------|------|--------------------------------|--|-------------------------------------|-----------------|-----------------------|---|
| miR156a-5p | <i>ZmFAR1-4</i>  | 4.5 | -1 | 1 | 20 | 6083 | 6102 | UGACAGAA<br>GAGAGUGA<br>GCAC   |  | CUGUGUA<br>UUCUCUU<br>UUCUCA        | Cleavage        | reverse<br>complement | 1 |
| miR156b-5p | <i>ZmFAR1-4</i>  | 4.5 | -1 | 1 | 20 | 6083 | 6102 | UGACAGAA<br>GAGAGUGA<br>GCAC   |  | CUGUGUA<br>UUCUCUU<br>UUCUCA        | Cleavage        | reverse<br>complement | 1 |
| miR156c    | <i>ZmFAR1-4</i>  | 4.5 | -1 | 1 | 20 | 6083 | 6102 | UGACAGAA<br>GAGAGUGA<br>GCAC   |  | CUGUGUA<br>UUCUCUU<br>UUCUCA        | Cleavage        | reverse<br>complement | 1 |
| miR156d-5p | <i>ZmFAR1-4</i>  | 4.5 | -1 | 1 | 20 | 6083 | 6102 | UGACAGAA<br>GAGAGUGA<br>GCAC   |  | CUGUGUA<br>UUCUCUU<br>UUCUCA        | Cleavage        | reverse<br>complement | 1 |
| miR156e-5p | <i>ZmFAR1-4</i>  | 4.5 | -1 | 1 | 20 | 6083 | 6102 | UGACAGAA<br>GAGAGUGA<br>GCAC   |  | CUGUGUA<br>UUCUCUU<br>UUCUCA        | Cleavage        | reverse<br>complement | 1 |
| miR156f-5p | <i>ZmFAR1-4</i>  | 4.5 | -1 | 1 | 20 | 6083 | 6102 | UGACAGAA<br>GAGAGUGA<br>GCAC   |  | CUGUGUA<br>UUCUCUU<br>UUCUCA        | Cleavage        | reverse<br>complement | 1 |
| miR156g-5p | <i>ZmFAR1-4</i>  | 4.5 | -1 | 1 | 20 | 6083 | 6102 | UGACAGAA<br>GAGAGUGA<br>GCAC   |  | CUGUGUA<br>UUCUCUU<br>UUCUCA        | Cleavage        | reverse<br>complement | 1 |
| miR156h-5p | <i>ZmFAR1-4</i>  | 4.5 | -1 | 1 | 20 | 6083 | 6102 | UGACAGAA<br>GAGAGUGA<br>GCAC   |  | CUGUGUA<br>UUCUCUU<br>UUCUCA        | Cleavage        | reverse<br>complement | 1 |
| miR156i-3p | <i>ZmFAR1-4</i>  | 4.5 | -1 | 1 | 22 | 6417 | 6438 | GCUCACUG<br>CUCUAUCU<br>GUCAUC |  | CAGGGCA<br>GAUUAUAG<br>UAAUGGG<br>C | Translatio<br>n | reverse<br>complement | 1 |
| miR156i-5p | <i>ZmFAR1-4</i>  | 4.5 | -1 | 1 | 20 | 6083 | 6102 | UGACAGAA<br>GAGAGUGA<br>GCAC   |  | CUGUGUA<br>UUCUCUU<br>UUCUCA        | Cleavage        | reverse<br>complement | 1 |
| miR156j-5p | <i>ZmFAR1-15</i> | 4.5 | -1 | 1 | 21 | 4394 | 4414 | UGACAGAA<br>GAGAGAGA<br>GCACA  |  | CCUGGUU<br>UUUUUUU<br>UCUGGCA       | Cleavage        | reverse<br>complement | 1 |
| miR156l-3p | <i>ZmFAR1-4</i>  | 4.5 | -1 | 1 | 22 | 6417 | 6438 | GCUCACUG<br>CUCUAUCU<br>GUCACC |  | CAGGGCA<br>GAUUAUAG<br>UAAUGGG<br>C | Translatio<br>n | reverse<br>complement | 1 |
| miR156l-5p | <i>ZmFAR1-4</i>  | 4.5 | -1 | 1 | 20 | 6083 | 6102 | UGACAGAA<br>GAGAGUGA<br>GCAC   |  | CUGUGUA<br>UUCUCUU<br>UUCUCA        | Cleavage        | reverse<br>complement | 1 |
| miR159a-3p | <i>ZmFAR1-10</i> | 4.5 | -1 | 1 | 21 | 7993 | 8013 | UUUGGAUU<br>GAAGGGAG<br>CUCUG  |  | AACAGCU<br>GGCUUUA<br>AUCCGAA       | Cleavage        |                       | 1 |
| miR159b-3p | <i>ZmFAR1-10</i> | 4.5 | -1 | 1 | 21 | 7993 | 8013 | UUUGGAUU<br>GAAGGGAG<br>CUCUG  |  | AACAGCU<br>GGCUUUA<br>AUCCGAA       | Cleavage        |                       | 1 |
| miR159c-3p | <i>ZmFAR1-16</i> | 4.5 | -1 | 1 | 21 | 700  | 720  | AUUGGUUU<br>GAAGGGAG<br>CUCCA  |  | GAGUGAU<br>GUCUCA<br>GACCAGU        | Cleavage        |                       | 1 |

|            |                  |     |    |   |    |      |      |                                |  |                                    |             |                    |   |
|------------|------------------|-----|----|---|----|------|------|--------------------------------|--|------------------------------------|-------------|--------------------|---|
| miR159e-5p | <i>ZmFAR1-15</i> | 4.5 | -1 | 1 | 21 | 318  | 338  | CAGCUCCU<br>GCAGCAUC<br>UGUUC  |  | UCUCGGC<br>UGCUCGC<br>GGAGCUG      | Translation | reverse complement | 1 |
| miR159f-3p | <i>ZmFAR1-10</i> | 4.5 | -1 | 1 | 21 | 7993 | 8013 | UUUGGAUU<br>GAAGGGAG<br>CUCUG  |  | AACAGCU<br>GGCUUUA<br>AUCCGAA      | Cleavage    |                    | 1 |
| miR159h-3p | <i>ZmFAR1-10</i> | 4.5 | -1 | 1 | 21 | 2981 | 3001 | UUUGGAGU<br>GAAGGGAG<br>CUCUG  |  | GGGUGCU<br>AUUUUUA<br>CUCCAGG      | Cleavage    |                    | 1 |
| miR159i-3p | <i>ZmFAR1-10</i> | 4.5 | -1 | 1 | 21 | 2981 | 3001 | UUUGGAGU<br>GAAGGGAG<br>CUCUG  |  | GGGUGCU<br>AUUUUUA<br>CUCCAGG      | Cleavage    |                    | 1 |
| miR159j-3p | <i>ZmFAR1-10</i> | 4.5 | -1 | 1 | 21 | 7993 | 8013 | UUUGGAUU<br>GAAGGGAG<br>CUCUG  |  | AACAGCU<br>GGCUUUA<br>AUCCGAA      | Cleavage    |                    | 1 |
| miR159k-3p | <i>ZmFAR1-10</i> | 4.5 | -1 | 1 | 21 | 7993 | 8013 | UUUGGAUU<br>GAAGGGAG<br>CUCUG  |  | AACAGCU<br>GGCUUUA<br>AUCCGAA      | Cleavage    |                    | 1 |
| miR160b-3p | <i>ZmFAR1-2</i>  | 4.5 | -1 | 1 | 21 | 2527 | 2547 | GCGUGCAA<br>GGAGCCAA<br>GCAUG  |  | UCUUCAU<br>GGCCCUU<br>UGCAUGC      | Translation | reverse complement | 1 |
| miR160g-3p | <i>ZmFAR1-2</i>  | 4.5 | -1 | 1 | 21 | 2527 | 2547 | GCGUGCAA<br>GGAGCCAA<br>GCAUG  |  | UCUUCAU<br>GGCCCUU<br>UGCAUGC      | Translation | reverse complement | 1 |
| miR164g-3p | <i>ZmFAR1-10</i> | 4.5 | -1 | 1 | 21 | 6379 | 6399 | CACGUGCU<br>CCCCUUCU<br>CCACC  |  | AAAGGCG<br>AGGGGGG<br>GCUCGUG      | Cleavage    |                    | 1 |
| miR166a-5p | <i>ZmFAR1-5</i>  | 4.5 | -1 | 1 | 21 | 4004 | 4024 | GGAAUGUU<br>GUCUGGCU<br>CGGGG  |  | AGGUGAG<br>CCAGACC<br>ACGUUUU      | Cleavage    | reverse complement | 1 |
| miR166b-5p | <i>ZmFAR1-5</i>  | 4.5 | -1 | 1 | 21 | 4004 | 4024 | GGAAUGUU<br>GUCUGGCU<br>CAAGG  |  | AGGUGAG<br>CCAGACC<br>ACGUUUU      | Cleavage    | reverse complement | 1 |
| miR166c-5p | <i>ZmFAR1-5</i>  | 4.5 | -1 | 1 | 21 | 4004 | 4024 | GGAAUGUU<br>GUCUGGCU<br>CGAGG  |  | AGGUGAG<br>CCAGACC<br>ACGUUUU      | Cleavage    | reverse complement | 1 |
| miR166d-5p | <i>ZmFAR1-5</i>  | 4.5 | -1 | 1 | 21 | 4004 | 4024 | GGAAUGUU<br>GUCUGGCU<br>CAAGG  |  | AGGUGAG<br>CCAGACC<br>ACGUUUU      | Cleavage    | reverse complement | 1 |
| miR166g-5p | <i>ZmFAR1-15</i> | 4.5 | -1 | 1 | 21 | 3746 | 3766 | GGAAUGUU<br>GUCUGGUU<br>GGAGA  |  | GAGCCAG<br>UCAGAU<br>ACCUUCU       | Cleavage    | reverse complement | 2 |
| miR166j-5p | <i>ZmFAR1-12</i> | 4.5 | -1 | 1 | 22 | 1541 | 1562 | GGUUUGUU<br>UGUCUGGU<br>UCAAGG |  | GAUUUGA<br>UCAGGCA<br>GAUAGAU<br>C | Cleavage    |                    | 1 |
| miR166j-5p | <i>ZmFAR1-3</i>  | 4.5 | -1 | 1 | 22 | 2656 | 2677 | GGUUUGUU<br>UGUCUGGU<br>UCAAGG |  | GCAUGUA<br>UCAGGUG<br>AAUGAAC<br>U | Cleavage    |                    | 1 |

|             |                  |     |    |   |    |      |      |                                |  |                                    |             |                       |   |
|-------------|------------------|-----|----|---|----|------|------|--------------------------------|--|------------------------------------|-------------|-----------------------|---|
| miR166m-5p  | <i>ZmFAR1-4</i>  | 4.5 | -1 | 1 | 21 | 2267 | 2287 | GGAAUGUU<br>GGCUGGCU<br>CGAGG  |  | CAUCAAC<br>CCAGCAA<br>ACGUUCU      | Cleavage    | reverse<br>complement | 1 |
| miR167e-3p  | <i>ZmFAR1-5</i>  | 4.5 | -1 | 1 | 22 | 3341 | 3362 | GAUCAUGC<br>UGUGCAGU<br>UUCAUC |  | AAUGAAA<br>GAGUACG<br>GUAUGAU<br>G | Cleavage    | reverse<br>complement | 1 |
| miR168a-5p  | <i>ZmFAR1-3</i>  | 4.5 | -1 | 1 | 21 | 265  | 285  | UCGCUUGG<br>UGCAGAUC<br>GGGAC  |  | GUCCUCG<br>UCUGCAA<br>CAAGUGG      | Cleavage    |                       | 1 |
| miR168b-5p  | <i>ZmFAR1-3</i>  | 4.5 | -1 | 1 | 21 | 265  | 285  | UCGCUUGG<br>UGCAGAUC<br>GGGAC  |  | GUCCUCG<br>UCUGCAA<br>CAAGUGG      | Cleavage    |                       | 1 |
| miR169f-3p  | <i>ZmFAR1-4</i>  | 4.5 | -1 | 1 | 21 | 5883 | 5903 | GGCAUGUC<br>UUCUUGG<br>CUACU   |  | CGUAGAU<br>GAGGAAG<br>ACGAGCU      | Cleavage    | reverse<br>complement | 1 |
| miR169n-3p  | <i>ZmFAR1-16</i> | 4.5 | -1 | 1 | 20 | 1893 | 1912 | GGCAGGCC<br>UUCUUGGC<br>UAAG   |  | UUUGGGC<br>AGGAAUG<br>UCUGUC       | Cleavage    |                       | 1 |
| miR169q-3p  | <i>ZmFAR1-4</i>  | 4.5 | -1 | 1 | 19 | 2471 | 2489 | GGCAGGCC<br>UUCUGGCU<br>AAG    |  | UUUGGUU<br>GGGUGGC<br>CUGCC        | Cleavage    | reverse<br>complement | 1 |
| miR171g-5p  | <i>ZmFAR1-11</i> | 4.5 | -1 | 1 | 21 | 3035 | 3055 | UAUUGACU<br>UGGCUCAU<br>CUCUC  |  | GUGGAAU<br>GUGCCAA<br>GUUGGUA      | Cleavage    |                       | 1 |
| miR171n-5p  | <i>ZmFAR1-7</i>  | 4.5 | -1 | 1 | 21 | 1864 | 1884 | UAUUGGUG<br>AGGUUCAA<br>UCCGA  |  | UUGAGUA<br>CAGCCUC<br>ACCAGUA      | Cleavage    | reverse<br>complement | 1 |
| miR2275b-5p | <i>ZmFAR1-10</i> | 4.5 | -1 | 1 | 21 | 7958 | 7978 | AGGAUUAG<br>AGGCAACU<br>GAACC  |  | GCUUCGC<br>UUGGCUU<br>UAAUCCG      | Translation |                       | 1 |
| miR2275c-5p | <i>ZmFAR1-15</i> | 4.5 | -1 | 1 | 21 | 4375 | 4395 | AGGAUUAG<br>AGGGACUU<br>GAACC  |  | GGUUCGA<br>GUCCUGU<br>UGAUCCC      | Cleavage    | reverse<br>complement | 1 |
| miR2275c-5p | <i>ZmFAR1-5</i>  | 4.5 | -1 | 1 | 21 | 3231 | 3251 | AGGAUUAG<br>AGGGACUU<br>GAACC  |  | AUUCCAA<br>GUCCUUU<br>UAAUCAG      | Cleavage    | reverse<br>complement | 1 |
| miR2275c-5p | <i>ZmFAR1-7</i>  | 4.5 | -1 | 1 | 21 | 596  | 616  | AGGAUUAG<br>AGGGACUU<br>GAACC  |  | AAUUCGA<br>GUCCCUU<br>GAGUCUG      | Cleavage    | reverse<br>complement | 1 |
| miR2275c-5p | <i>ZmFAR1-9</i>  | 4.5 | -1 | 1 | 21 | 5119 | 5139 | AGGAUUAG<br>AGGGACUU<br>GAACC  |  | UAUUCAA<br>CUCCUUC<br>AAGUCCC      | Cleavage    |                       | 1 |
| miR2275d-3p | <i>ZmFAR1-9</i>  | 4.5 | -1 | 1 | 22 | 4569 | 4590 | UUUGUUUU<br>CCUCUAAU<br>AUCUCA |  | ACAGAUG<br>UUAGAGA<br>AGAAGAG<br>A | Cleavage    |                       | 1 |
| miR2275d-3p | <i>ZmFAR1-2</i>  | 4.5 | -1 | 1 | 22 | 4415 | 4436 | UUUGUUUU<br>CCUCUAAU<br>AUCUCA |  | UCUGCUA<br>UGAGUGG                 | Translation | reverse<br>complement | 1 |



|             |                  |     |    |   |    |      |      |                                 |  |                                     |                 |                       |   |
|-------------|------------------|-----|----|---|----|------|------|---------------------------------|--|-------------------------------------|-----------------|-----------------------|---|
|             |                  |     |    |   |    |      |      |                                 |  | AAAACAA<br>C                        |                 |                       |   |
| miR2275d-5p | <i>ZmFAR1-2</i>  | 4.5 | -1 | 1 | 21 | 1832 | 1852 | AGAGUUGG<br>AGGAAAGA<br>AAACU   |  | UUUCUUC<br>UUUCCUC<br>UCCCUCU       | Cleavage        | reverse<br>complement | 1 |
| miR394a-3p  | <i>ZmFAR1-6</i>  | 4.5 | -1 | 1 | 20 | 2845 | 2864 | AGGUGGGC<br>AUACUGCC<br>AAUG    |  | AAUUUUC<br>AGAAUGU<br>CCGCCU        | Translatio<br>n |                       | 1 |
| miR394b-3p  | <i>ZmFAR1-6</i>  | 4.5 | -1 | 1 | 20 | 2845 | 2864 | AGGUGGGC<br>AUACUGCC<br>AAUG    |  | AAUUUUC<br>AGAAUGU<br>CCGCCU        | Translatio<br>n |                       | 1 |
| miR395a-5p  | <i>ZmFAR1-3</i>  | 4.5 | -1 | 1 | 23 | 3105 | 3127 | GUUCUCCU<br>CAAACCAC<br>UUCAGUU |  | UUAGGAG<br>GUGGAUC<br>GAGGGGA<br>AU | Translatio<br>n |                       | 1 |
| miR395c-3p  | <i>ZmFAR1-4</i>  | 4.5 | -1 | 1 | 21 | 1922 | 1942 | GUGAAGUG<br>UUUGGAGG<br>AACUC   |  | CAACUCU<br>UCCAGAC<br>AUUUCAG       | Cleavage        | reverse<br>complement | 1 |
| miR395k-3p  | <i>ZmFAR1-4</i>  | 4.5 | -1 | 1 | 21 | 3103 | 3123 | GUGAAGUG<br>UUUGGAGG<br>AACUC   |  | AUAUUUC<br>CUUAAGU<br>GUUUCAA       | Cleavage        | reverse<br>complement | 1 |
| miR395l-3p  | <i>ZmFAR1-4</i>  | 4.5 | -1 | 1 | 21 | 1922 | 1942 | GUGAAGUG<br>UUUGGAGG<br>AACUC   |  | CAACUCU<br>UCCAGAC<br>AUUUCAG       | Cleavage        | reverse<br>complement | 1 |
| miR395m-3p  | <i>ZmFAR1-4</i>  | 4.5 | -1 | 1 | 21 | 1922 | 1942 | GUGAAGUG<br>UUUGGAGG<br>AACUC   |  | CAACUCU<br>UCCAGAC<br>AUUUCAG       | Cleavage        | reverse<br>complement | 1 |
| miR395o-3p  | <i>ZmFAR1-14</i> | 4.5 | -1 | 1 | 21 | 346  | 366  | GUGAAGUG<br>UUUGGGUG<br>AACUC   |  | AUGUACA<br>CCCAUUA<br>CCUUCAC       | Translatio<br>n |                       | 1 |
| miR396c     | <i>ZmFAR1-1</i>  | 4.5 | -1 | 1 | 22 | 4301 | 4322 | UUCCACAG<br>GCUUUCUU<br>GAACUG  |  | UAAUACA<br>AGAUGGC<br>CAGUGGA<br>A  | Cleavage        | reverse<br>complement | 1 |
| miR396d     | <i>ZmFAR1-1</i>  | 4.5 | -1 | 1 | 22 | 4301 | 4322 | UUCCACAG<br>GCUUUCUU<br>GAACUG  |  | UAAUACA<br>AGAUGGC<br>CAGUGGA<br>A  | Cleavage        | reverse<br>complement | 1 |
| miR396e-3p  | <i>ZmFAR1-6</i>  | 4.5 | -1 | 1 | 21 | 814  | 834  | GGUCAAGA<br>AAGCCGUG<br>GGAAG   |  | ACGCCCA<br>GGGCCUU<br>CUUGAUU       | Translatio<br>n |                       | 1 |
| miR396g-3p  | <i>ZmFAR1-11</i> | 4.5 | -1 | 1 | 21 | 2648 | 2668 | GUUCAAGA<br>AAGCUGUG<br>GAAGA   |  | AUUUUUA<br>CCGCUUU<br>AUUGAAU       | Cleavage        |                       | 1 |
| miR397a-3p  | <i>ZmFAR1-10</i> | 4.5 | -1 | 1 | 22 | 256  | 277  | UAGCCGUU<br>AGCGCUCA<br>UUAACU  |  | GUUUGAU<br>AUGUGCU<br>AACAGCU<br>A  | Cleavage        |                       | 1 |
| miR399b-5p  | <i>ZmFAR1-10</i> | 4.5 | -1 | 1 | 21 | 8952 | 8972 | GUGCAGCU<br>CUCCUCUG<br>GCAUG   |  | CAUACCA<br>AAGGAGA<br>GCUCUAU       | Cleavage        |                       | 1 |

|            |                  |     |    |   |    |      |      |                                |  |                                    |             |                       |   |
|------------|------------------|-----|----|---|----|------|------|--------------------------------|--|------------------------------------|-------------|-----------------------|---|
| miR399e-5p | <i>ZmFAR1-4</i>  | 4.5 | -1 | 1 | 21 | 5625 | 5645 | GGGCUUCU<br>CUUUCUUG<br>GCAGG  |  | UCUGCCA<br>UGGAAGG<br>CAAGCUU      | Cleavage    | reverse<br>complement | 1 |
| miR399h-5p | <i>ZmFAR1-13</i> | 4.5 | -1 | 1 | 21 | 325  | 345  | GUGCAGUU<br>CUCCUCUG<br>GCACG  |  | AGGGGCG<br>GAGGGGA<br>GCUCGAC      | Cleavage    |                       | 1 |
| miR399i-5p | <i>ZmFAR1-13</i> | 4.5 | -1 | 1 | 21 | 325  | 345  | GUGCAGUU<br>CUCCUCUG<br>GCAUG  |  | AGGGGCG<br>GAGGGGA<br>GCUCGAC      | Cleavage    |                       | 1 |
| miR528a-5p | <i>ZmFAR1-4</i>  | 4.5 | -1 | 1 | 21 | 966  | 986  | UGGAAGGG<br>GAGAGUAC<br>AGGAG  |  | ACCCUCU<br>CCAGGCC<br>UCUUCUC      | Translation | reverse<br>complement | 1 |
| miR528b-5p | <i>ZmFAR1-4</i>  | 4.5 | -1 | 1 | 21 | 966  | 986  | UGGAAGGG<br>GCAUGCAG<br>AGGAG  |  | ACCCUCU<br>CCAGGCC<br>UCUUCUC      | Translation | reverse<br>complement | 1 |
| miR529-3p  | <i>ZmFAR1-16</i> | 4.5 | -1 | 1 | 21 | 629  | 649  | GCUGUACC<br>CUCUCUCU<br>UCUUC  |  | AUGGAAG<br>AGGAAGA<br>GUUAAGC      | Translation |                       | 1 |
| miR529-5p  | <i>ZmFAR1-4</i>  | 4.5 | -1 | 1 | 21 | 6080 | 6100 | AGAAGAGA<br>GAGAGUAC<br>AGCCU  |  | AGCCUGU<br>GUUUUCU<br>CUUUUCU      | Cleavage    | reverse<br>complement | 1 |
| miR827-5p  | <i>ZmFAR1-12</i> | 4.5 | -1 | 1 | 21 | 371  | 391  | UUUGUUGG<br>UGGUCAUU<br>UAACC  |  | GUUCAA<br>UUACUAC<br>CAAAAA        | Cleavage    |                       | 1 |
| miR1432-5p | <i>ZmFAR1-6</i>  | 5   | -1 | 1 | 21 | 2616 | 2636 | CUCAGGAG<br>AGAUGACA<br>CCGAC  |  | GUUUUUG<br>UCAUCUC<br>UUUGGAG      | Cleavage    |                       | 1 |
| miR1432-3p | <i>ZmFAR1-13</i> | 5   | -1 | 1 | 21 | 3976 | 3996 | CUCAGGAG<br>AGAUGACA<br>CCGAC  |  | AACAGUC<br>UCAUCUC<br>UCACGAG      | Cleavage    |                       | 1 |
| miR156d-3p | <i>ZmFAR1-12</i> | 5   | -1 | 1 | 22 | 944  | 965  | GCUCACUU<br>CUCUUUCU<br>GUCAGC |  | UUCGGGA<br>GAAGAAG<br>AAGGGAG<br>C | Translation |                       | 1 |
| miR156f-3p | <i>ZmFAR1-12</i> | 5   | -1 | 1 | 22 | 944  | 965  | GCUCACUU<br>CUCUUUCU<br>GUCAGC |  | UUCGGGA<br>GAAGAAG<br>AAGGGAG<br>C | Translation |                       | 1 |
| miR156g-3p | <i>ZmFAR1-12</i> | 5   | -1 | 1 | 22 | 944  | 965  | GCUCACUU<br>CUCUUUCU<br>GUCAGC |  | UUCGGGA<br>GAAGAAG<br>AAGGGAG<br>C | Translation |                       | 1 |
| miR156i-3p | <i>ZmFAR1-3</i>  | 5   | -1 | 1 | 22 | 2939 | 2960 | GCUCACUG<br>CUCUAUCU<br>GUCAUC |  | UUCUACA<br>GAUAGAG<br>GAGUGAC<br>U | Cleavage    |                       | 1 |
| miR156j-5p | <i>ZmFAR1-4</i>  | 5   | -1 | 1 | 21 | 627  | 647  | UGACAGAA<br>GAGAGAGA<br>GCACA  |  | AUUCCCC<br>UUUCUUU<br>UCUUUCG      | Cleavage    | reverse<br>complement | 1 |

|            |                  |   |    |   |    |      |      |                                |  |                                    |             |                    |   |
|------------|------------------|---|----|---|----|------|------|--------------------------------|--|------------------------------------|-------------|--------------------|---|
| miR156k-3p | <i>ZmFAR1-10</i> | 5 | -1 | 1 | 22 | 5376 | 5397 | GCUCGCUU<br>CUCUUUCU<br>GUCAGC |  | GGCGGCG<br>GCGAGGG<br>AGGGCGG<br>G | Cleavage    |                    | 1 |
| miR156k-3p | <i>ZmFAR1-12</i> | 5 | -1 | 1 | 22 | 944  | 965  | GCUCGCUU<br>CUCUUUCU<br>GUCAGC |  | UUCGGGA<br>GAAGAA<br>AAGGGAG<br>C  | Translation |                    | 1 |
| miR156l-3p | <i>ZmFAR1-3</i>  | 5 | -1 | 1 | 22 | 2939 | 2960 | GCUCACUG<br>CUCUAUCU<br>GUCACC |  | UUCUACA<br>GAUAGAG<br>GAGUGAC<br>U | Cleavage    |                    | 1 |
| miR159b-5p | <i>ZmFAR1-15</i> | 5 | -1 | 1 | 21 | 480  | 500  | GUGCUCUU<br>UUCAAAAC<br>AAUAA  |  | UGAUUUG<br>AUUGCAG<br>AGGGCGC      | Translation | reverse complement | 1 |
| miR159c-3p | <i>ZmFAR1-5</i>  | 5 | -1 | 1 | 21 | 4855 | 4875 | AUUGGUUU<br>GAAGGGAG<br>CUCCA  |  | CCGGGCC<br>UCCUUG<br>GAUCAA        | Cleavage    | reverse complement | 1 |
| miR159g-3p | <i>ZmFAR1-5</i>  | 5 | -1 | 1 | 21 | 582  | 602  | UUUGGAGU<br>GAAGGGAG<br>UUCUG  |  | GAGGACU<br>CUUUCUG<br>UCCGAA       | Translation | reverse complement | 2 |
| miR159g-3p | <i>ZmFAR1-5</i>  | 5 | -1 | 1 | 21 | 4045 | 4065 | UUUGGAGU<br>GAAGGGAG<br>UUCUG  |  | CGGAACG<br>CCUUUGA<br>CCCCGAA      | Cleavage    | reverse complement | 2 |
| miR159g-3p | <i>ZmFAR1-8</i>  | 5 | -1 | 1 | 21 | 367  | 387  | UUUGGAGU<br>GAAGGGAG<br>UUCUG  |  | AAGGACU<br>ACUUCUG<br>CUCCAAG      | Translation | reverse complement | 1 |
| miR159g-3p | <i>ZmFAR1-2</i>  | 5 | -1 | 1 | 21 | 3301 | 3321 | UUUGGAGU<br>GAAGGGAG<br>UUCUG  |  | AGGUACU<br>CCAUCG<br>UUCAAA        | Translation | reverse complement | 1 |
| miR159g-3p | <i>ZmFAR1-10</i> | 5 | -1 | 1 | 21 | 2981 | 3001 | UUUGGAGU<br>GAAGGGAG<br>UUCUG  |  | GGGUGCU<br>AUUUUA<br>CUCCAGG       | Cleavage    |                    | 1 |
| miR159h-3p | <i>ZmFAR1-6</i>  | 5 | -1 | 1 | 21 | 507  | 527  | UUUGGAGU<br>GAAGGGAG<br>CUCUG  |  | AAGAGGU<br>UCGUUUG<br>CUCCAGG      | Cleavage    |                    | 1 |
| miR159i-3p | <i>ZmFAR1-6</i>  | 5 | -1 | 1 | 21 | 507  | 527  | UUUGGAGU<br>GAAGGGAG<br>CUCUG  |  | AAGAGGU<br>UCGUUUG<br>CUCCAGG      | Cleavage    |                    | 1 |
| miR159j-5p | <i>ZmFAR1-15</i> | 5 | -1 | 1 | 21 | 480  | 500  | GUGCUCUU<br>UUCAAAAC<br>AAUAA  |  | UGAUUUG<br>AUUGCAG<br>AGGGCGC      | Translation | reverse complement | 1 |
| miR159k-5p | <i>ZmFAR1-15</i> | 5 | -1 | 1 | 21 | 480  | 500  | GUGCUCUU<br>UUCAAAAC<br>AAUAA  |  | UGAUUUG<br>AUUGCAG<br>AGGGCGC      | Translation | reverse complement | 1 |
| miR160c-3p | <i>ZmFAR1-10</i> | 5 | -1 | 1 | 21 | 2794 | 2814 | GCGUGCAU<br>GGUGCCAA<br>GCAUA  |  | GUUGUUU<br>UGCAAUA<br>UGCAGGC      | Translation |                    | 1 |

|            |                  |   |    |   |    |      |      |                                 |  |                               |             |                    |   |
|------------|------------------|---|----|---|----|------|------|---------------------------------|--|-------------------------------|-------------|--------------------|---|
| miR160c-3p | <i>ZmFAR1-9</i>  | 5 | -1 | 1 | 21 | 6    | 26   | GCGUGCAU<br>GGUGCCAA<br>GCAUA   |  | CGUCCUC<br>CGCACCG<br>UCCACGC | Cleavage    |                    | 1 |
| miR160f-3p | <i>ZmFAR1-2</i>  | 5 | -1 | 1 | 21 | 2527 | 2547 | GCGUGCGA<br>GGUGCCAG<br>GCAUG   |  | UCUUCAU<br>GGCCCUU<br>UGCAUGC | Translation | reverse complement | 1 |
| miR164a-3p | <i>ZmFAR1-9</i>  | 5 | -1 | 1 | 21 | 934  | 954  | CACGUGUU<br>CUCCUUCU<br>CCAUC   |  | CUGGGAG<br>AGGGAGA<br>GCAAAUG | Cleavage    |                    | 1 |
| miR164c-3p | <i>ZmFAR1-9</i>  | 5 | -1 | 1 | 21 | 934  | 954  | CAUGUGCC<br>CUUCUUCU<br>CCAUC   |  | CUGGGAG<br>AGGGAGA<br>GCAAAUG | Cleavage    |                    | 1 |
| miR164d-3p | <i>ZmFAR1-9</i>  | 5 | -1 | 1 | 20 | 1219 | 1238 | CACGUGGU<br>CUCCUUCU<br>CCAU    |  | UUGGGGA<br>AGGAGAC<br>GAUGAA  | Cleavage    |                    | 1 |
| miR164d-3p | <i>ZmFAR1-2</i>  | 5 | -1 | 1 | 20 | 1880 | 1899 | CACGUGGU<br>CUCCUUCU<br>CCAU    |  | GGGGAGU<br>GGGGGAU<br>CAGGUG  | Cleavage    | reverse complement | 1 |
| miR164e-3p | <i>ZmFAR1-13</i> | 5 | -1 | 1 | 21 | 4230 | 4250 | CAUGUGUC<br>CGCCUCU<br>CCACC    |  | AGUUGGG<br>UGGGCGG<br>ACCUGUG | Cleavage    |                    | 1 |
| miR164h-3p | <i>ZmFAR1-9</i>  | 5 | -1 | 1 | 21 | 934  | 954  | CAUGUGCC<br>CUUCUUCU<br>CCAUC   |  | CUGGGAG<br>AGGGAGA<br>GCAAAUG | Cleavage    |                    | 1 |
| miR166a-5p | <i>ZmFAR1-15</i> | 5 | -1 | 1 | 21 | 3746 | 3766 | GGAAUGUU<br>GUCUGGCU<br>CGGGG   |  | GAGCCAG<br>UCAGAU<br>ACCUUCU  | Cleavage    | reverse complement | 1 |
| miR166c-5p | <i>ZmFAR1-15</i> | 5 | -1 | 1 | 21 | 3746 | 3766 | GGAAUGUU<br>GUCUGGCU<br>CGAGG   |  | GAGCCAG<br>UCAGAU<br>ACCUUCU  | Cleavage    | reverse complement | 1 |
| miR166g-5p | <i>ZmFAR1-4</i>  | 5 | -1 | 1 | 21 | 2116 | 2136 | GGAAUGUU<br>UGUGACAG<br>GGAGA   |  | UCUCCAA<br>GUAGACC<br>ACAUCU  | Cleavage    | reverse complement | 1 |
| miR166g-5p | <i>ZmFAR1-5</i>  | 5 | -1 | 1 | 21 | 2375 | 2395 | GGAAUGUU<br>GUCUGGCU<br>GGAGA   |  | UCUUCUA<br>CCAGGUA<br>AUGAUCC | Cleavage    | reverse complement | 1 |
| miR166g-5p | <i>ZmFAR1-10</i> | 5 | -1 | 1 | 21 | 3068 | 3088 | GGAAUGUU<br>GUCUGGCU<br>GGAGA   |  | UAGGCAA<br>UCAACA<br>GCAUUUC  | Translation |                    | 1 |
| miR167b-3p | <i>ZmFAR1-1</i>  | 5 | -1 | 1 | 23 | 3222 | 3244 | GAUCAUGC<br>UGUGACAG<br>UUUCACU |  | UCCAACA<br>UUGUCAC<br>AUUGGGU | Cleavage    | reverse complement | 1 |
| miR168a-5p | <i>ZmFAR1-8</i>  | 5 | -1 | 1 | 21 | 337  | 357  | UCGCUUGG<br>UGCAGAU<br>GGGAC    |  | UACUUCA<br>CCGGCAC<br>CAAGCGG | Cleavage    | reverse complement | 1 |
| miR168b-5p | <i>ZmFAR1-8</i>  | 5 | -1 | 1 | 21 | 337  | 357  | UCGCUUGG<br>UGCAGAU<br>GGGAC    |  | UACUUCA<br>CCGGCAC<br>CAAGCGG | Cleavage    | reverse complement | 1 |

|            |                  |   |    |   |    |      |      |                               |  |                               |             |                       |   |
|------------|------------------|---|----|---|----|------|------|-------------------------------|--|-------------------------------|-------------|-----------------------|---|
| miR169a-5p | <i>ZmFAR1-7</i>  | 5 | -1 | 1 | 21 | 1275 | 1295 | CAGCCAAG<br>GAUGACUU<br>GCCGA |  | GCAGCCU<br>GUUGUUU<br>UUGGCUG | Cleavage    | reverse<br>complement | 1 |
| miR169b-5p | <i>ZmFAR1-7</i>  | 5 | -1 | 1 | 21 | 1275 | 1295 | CAGCCAAG<br>GAUGACUU<br>GCCGA |  | GCAGCCU<br>GUUGUUU<br>UUGGCUG | Cleavage    | reverse<br>complement | 1 |
| miR169c-5p | <i>ZmFAR1-7</i>  | 5 | -1 | 1 | 21 | 1275 | 1295 | CAGCCAAG<br>GAUGACUU<br>GCCGG |  | GCAGCCU<br>GUUGUUU<br>UUGGCUG | Cleavage    | reverse<br>complement | 1 |
| miR169f-3p | <i>ZmFAR1-6</i>  | 5 | -1 | 1 | 21 | 4072 | 4092 | GGCAUGUC<br>UUCUUGG<br>CUACU  |  | UUGACUU<br>AAGGAAG<br>ACUUGUC | Cleavage    |                       | 1 |
| miR169m-5p | <i>ZmFAR1-10</i> | 5 | -1 | 1 | 21 | 1480 | 1500 | UAGCCAAG<br>AAUGGCUU<br>GCCUA |  | GCAGAAA<br>CCUAUUC<br>AUGGCUA | Cleavage    |                       | 1 |
| miR169n-5p | <i>ZmFAR1-10</i> | 5 | -1 | 1 | 21 | 1480 | 1500 | UAGCCAAG<br>AAUGGCUU<br>GCCUA |  | GCAGAAA<br>CCUAUUC<br>AUGGCUA | Cleavage    |                       | 1 |
| miR169o-5p | <i>ZmFAR1-7</i>  | 5 | -1 | 1 | 21 | 1275 | 1295 | UAGCCAAG<br>AAUGGCUU<br>GCCUA |  | GCAGCCU<br>GUUGUUU<br>UUGGCUG | Cleavage    | reverse<br>complement | 1 |
| miR169p-3p | <i>ZmFAR1-4</i>  | 5 | -1 | 1 | 21 | 2040 | 2060 | GGCAAGUC<br>AUCUGGG<br>CUACG  |  | AAUUGCU<br>UCAGGUG<br>AUUUAUC | Cleavage    | reverse<br>complement | 1 |
| miR169q-5p | <i>ZmFAR1-10</i> | 5 | -1 | 1 | 21 | 1480 | 1500 | UAGCCAAG<br>AAUGGCUU<br>GCCUA |  | GCAGAAA<br>CCUAUUC<br>AUGGCUA | Cleavage    |                       | 1 |
| miR169r-3p | <i>ZmFAR1-11</i> | 5 | -1 | 1 | 21 | 649  | 669  | GGCAAGUU<br>GUCCUUG<br>CUACA  |  | UGUAGCA<br>GUGGCCA<br>GCUUGCC | Translation |                       | 1 |
| miR169t-5p | <i>ZmFAR1-7</i>  | 5 | -1 | 1 | 21 | 1275 | 1295 | CAGCCAAG<br>GAUGACUU<br>GCCGG |  | GCAGCCU<br>GUUGUUU<br>UUGGCUG | Cleavage    | reverse<br>complement | 1 |
| miR171a-5p | <i>ZmFAR1-1</i>  | 5 | -1 | 1 | 21 | 3889 | 3909 | UAUUGGCG<br>AGGUUCAA<br>UCAGA |  | CUUGAUA<br>GCACCAU<br>GUCAAUA | Cleavage    | reverse<br>complement | 1 |
| miR171c-5p | <i>ZmFAR1-4</i>  | 5 | -1 | 1 | 21 | 2023 | 2043 | UAUUGGUG<br>CGGUUCAA<br>UCAGA |  | CUUGAAU<br>GAGUCGU<br>AACAAUU | Cleavage    | reverse<br>complement | 1 |
| miR171f-5p | <i>ZmFAR1-9</i>  | 5 | -1 | 1 | 21 | 3481 | 3501 | CGAUGUUG<br>GCAUGGCU<br>CAAUC |  | AAAUGAC<br>UCAUGGC<br>AAUAUUG | Cleavage    |                       | 1 |
| miR171h-5p | <i>ZmFAR1-14</i> | 5 | -1 | 1 | 21 | 2138 | 2158 | UGGUAUUG<br>UUUCGGCU<br>CAUGU |  | GAAUUGG<br>UUGAAGC<br>AAUGCAA | Cleavage    |                       | 1 |
| miR171i-5p | <i>ZmFAR1-1</i>  | 5 | -1 | 1 | 21 | 3889 | 3909 | UGUUGGCA<br>CGGUUCAA<br>UCAAA |  | CUUGAUA<br>GCACCAU<br>GUCAAUA | Cleavage    | reverse<br>complement | 1 |

|             |                  |   |    |   |    |      |      |                                |  |                                    |             |                    |   |
|-------------|------------------|---|----|---|----|------|------|--------------------------------|--|------------------------------------|-------------|--------------------|---|
| miR171k-3p  | <i>ZmFAR1-14</i> | 5 | -1 | 1 | 21 | 2138 | 2158 | UGGUAUUG<br>UUUCGGCU<br>CAUGU  |  | GAAUUGG<br>UUGAAGC<br>AAUGCAA      | Cleavage    |                    | 1 |
| miR172a     | <i>ZmFAR1-1</i>  | 5 | -1 | 1 | 20 | 3341 | 3360 | AGAAUCUU<br>GAUGAUGC<br>UGCA   |  | CCAGGCC<br>UCUUCAA<br>GAUUCU       | Translation | reverse complement | 1 |
| miR172a     | <i>ZmFAR1-10</i> | 5 | -1 | 1 | 20 | 4845 | 4864 | AGAAUCUU<br>GAUGAUGC<br>UGCA   |  | AACAUCU<br>UCAUCAA<br>UGUUCU       | Cleavage    |                    | 1 |
| miR172b-3p  | <i>ZmFAR1-1</i>  | 5 | -1 | 1 | 20 | 3341 | 3360 | AGAAUCUU<br>GAUGAUGC<br>UGCA   |  | CCAGGCC<br>UCUUCAA<br>GAUUCU       | Translation | reverse complement | 1 |
| miR172b-3p  | <i>ZmFAR1-10</i> | 5 | -1 | 1 | 20 | 4845 | 4864 | AGAAUCUU<br>GAUGAUGC<br>UGCA   |  | AACAUCU<br>UCAUCAA<br>UGUUCU       | Cleavage    |                    | 1 |
| miR172c-3p  | <i>ZmFAR1-1</i>  | 5 | -1 | 1 | 20 | 3341 | 3360 | AGAAUCUU<br>GAUGAUGC<br>UGCA   |  | CCAGGCC<br>UCUUCAA<br>GAUUCU       | Translation | reverse complement | 1 |
| miR172c-3p  | <i>ZmFAR1-10</i> | 5 | -1 | 1 | 20 | 4845 | 4864 | AGAAUCUU<br>GAUGAUGC<br>UGCA   |  | AACAUCU<br>UCAUCAA<br>UGUUCU       | Cleavage    |                    | 1 |
| miR172c-5p  | <i>ZmFAR1-2</i>  | 5 | -1 | 1 | 20 | 897  | 916  | CAGCACCA<br>CCAAGAUU<br>CACA   |  | UGUUGGG<br>UUGGGUG<br>GUGCUG       | Translation | reverse complement | 1 |
| miR172d-3p  | <i>ZmFAR1-1</i>  | 5 | -1 | 1 | 20 | 3341 | 3360 | AGAAUCUU<br>GAUGAUGC<br>UGCA   |  | CCAGGCC<br>UCUUCAA<br>GAUUCU       | Translation | reverse complement | 1 |
| miR172d-3p  | <i>ZmFAR1-10</i> | 5 | -1 | 1 | 20 | 4845 | 4864 | AGAAUCUU<br>GAUGAUGC<br>UGCA   |  | AACAUCU<br>UCAUCAA<br>UGUUCU       | Cleavage    |                    | 1 |
| miR2118a    | <i>ZmFAR1-12</i> | 5 | -1 | 1 | 22 | 930  | 951  | UUCUGAU<br>GCCUCUA<br>UUCCUA   |  | CUCGAGA<br>GAGGGGU<br>UUCGGGA<br>G | Cleavage    |                    | 1 |
| miR2118f    | <i>ZmFAR1-15</i> | 5 | -1 | 1 | 22 | 5207 | 5228 | UUCCCAAU<br>GCCUCCA<br>UGCCUA  |  | GGUAGAU<br>GGAAGGC<br>AUUGUAA<br>A | Cleavage    | reverse complement | 1 |
| miR2118g    | <i>ZmFAR1-15</i> | 5 | -1 | 1 | 22 | 3218 | 3239 | UUCUGAU<br>GCCUCCA<br>UUCCUA   |  | AGAGAAU<br>AGGAGGC<br>AAGAAGA<br>G | Cleavage    | reverse complement | 1 |
| miR2275a-3p | <i>ZmFAR1-10</i> | 5 | -1 | 1 | 22 | 930  | 951  | UUUGUUUU<br>CCUCCAAU<br>AUCUCA |  | AGUGAAG<br>UUGUGGG<br>GAGAUAA<br>A | Cleavage    |                    | 1 |
| miR2275a-3p | <i>ZmFAR1-5</i>  | 5 | -1 | 1 | 22 | 4491 | 4512 | UUUGUUUU<br>CCUCCAAU<br>AUCUCA |  | CAUCAUG<br>UUGUAGG<br>AAACUAA<br>A | Cleavage    | reverse complement | 1 |

|             |                  |   |    |   |    |      |      |                                |  |                                    |             |                    |   |
|-------------|------------------|---|----|---|----|------|------|--------------------------------|--|------------------------------------|-------------|--------------------|---|
| miR2275a-5p | <i>ZmFAR1-13</i> | 5 | -1 | 1 | 21 | 1563 | 1583 | AGAGUUGG<br>AGGAAAGC<br>AAACC  |  | UGGUCGU<br>UUUCCU<br>CCAUUUU       | Cleavage    |                    | 1 |
| miR2275a-5p | <i>ZmFAR1-2</i>  | 5 | -1 | 1 | 21 | 2537 | 2557 | AGAGUUGG<br>AGGAAAGC<br>AAACC  |  | CCUUUGC<br>AUGCUUU<br>UAAUUUU      | Cleavage    | reverse complement | 1 |
| miR2275a-5p | <i>ZmFAR1-4</i>  | 5 | -1 | 1 | 21 | 632  | 652  | AGAGUUGG<br>AGGAAAGC<br>AAACC  |  | CCUUUCU<br>UUUCUUU<br>CGCUUCU      | Cleavage    | reverse complement | 1 |
| miR2275a-5p | <i>ZmFAR1-1</i>  | 5 | -1 | 1 | 21 | 1000 | 1020 | AGAGUUGG<br>AGGAAAGC<br>AAACC  |  | AUUUUGC<br>ACUUCUC<br>CAGCCCU      | Cleavage    | reverse complement | 1 |
| miR2275b-3p | <i>ZmFAR1-5</i>  | 5 | -1 | 1 | 22 | 4491 | 4512 | UUCAGUUU<br>CCUCUAAU<br>AUCUCA |  | CAUCAUG<br>UUGUAGG<br>AAACUAA<br>A | Cleavage    | reverse complement | 1 |
| miR2275b-3p | <i>ZmFAR1-15</i> | 5 | -1 | 1 | 22 | 3608 | 3629 | UUCAGUUU<br>CCUCUAAU<br>AUCUCA |  | GUUGGUG<br>AUGGAUG<br>AAACUGA<br>U | Translation | reverse complement | 1 |
| miR2275b-5p | <i>ZmFAR1-1</i>  | 5 | -1 | 1 | 21 | 1591 | 1611 | AGGAUUAG<br>AGGCAACU<br>GAACC  |  | AGUUCAG<br>UUGCAUC<br>UGAGCUC      | Translation | reverse complement | 1 |
| miR2275b-5p | <i>ZmFAR1-2</i>  | 5 | -1 | 1 | 21 | 2537 | 2557 | AGGAUUAG<br>AGGCAACU<br>GAACC  |  | CCUUUGC<br>AUGCUUU<br>UAAUUUU      | Cleavage    | reverse complement | 1 |
| miR2275b-5p | <i>ZmFAR1-12</i> | 5 | -1 | 1 | 21 | 1480 | 1500 | AGGAUUAG<br>AGGCAACU<br>GAACC  |  | GCUGCAG<br>CAGCUUC<br>UGAUCUU      | Cleavage    |                    | 1 |
| miR2275c-3p | <i>ZmFAR1-5</i>  | 5 | -1 | 1 | 22 | 4491 | 4512 | UUCAGUUU<br>CCUCUAAU<br>AUCUCA |  | CAUCAUG<br>UUGUAGG<br>AAACUAA<br>A | Cleavage    | reverse complement | 1 |
| miR2275c-3p | <i>ZmFAR1-15</i> | 5 | -1 | 1 | 22 | 3608 | 3629 | UUCAGUUU<br>CCUCUAAU<br>AUCUCA |  | GUUGGUG<br>AUGGAUG<br>AAACUGA<br>U | Translation | reverse complement | 1 |
| miR2275d-5p | <i>ZmFAR1-4</i>  | 5 | -1 | 1 | 21 | 632  | 652  | AGAGUUGG<br>AGGAAAGA<br>AAACU  |  | CCUUUCU<br>UUUCUUU<br>CGCUUCU      | Cleavage    | reverse complement | 1 |
| miR319a-3p  | <i>ZmFAR1-16</i> | 5 | -1 | 1 | 20 | 1346 | 1365 | UUGGACUG<br>AAGGGUGC<br>UCCC   |  | AGGAAUG<br>UCUUUUG<br>GUCUGA       | Cleavage    |                    | 1 |
| miR319a-5p  | <i>ZmFAR1-15</i> | 5 | -1 | 1 | 20 | 481  | 500  | GAGCUCUC<br>UUCAGUCC<br>ACUC   |  | GAUUGGA<br>UUGCAGA<br>GGGCGC       | Translation | reverse complement | 1 |
| miR319b-3p  | <i>ZmFAR1-16</i> | 5 | -1 | 1 | 20 | 1346 | 1365 | UUGGACUG<br>AAGGGUGC<br>UCCC   |  | AGGAAUG<br>UCUUUUG<br>GUCUGA       | Cleavage    |                    | 1 |



|            |                  |   |    |   |    |      |      |                                |  |                                    |             |                    |   |
|------------|------------------|---|----|---|----|------|------|--------------------------------|--|------------------------------------|-------------|--------------------|---|
| miR319c-3p | <i>ZmFAR1-16</i> | 5 | -1 | 1 | 20 | 1346 | 1365 | UUGGACUG<br>AAGGGUGC<br>UCCC   |  | AGGAAUG<br>UCUUUUG<br>GUCUGA       | Cleavage    |                    | 1 |
| miR319c-5p | <i>ZmFAR1-15</i> | 5 | -1 | 1 | 20 | 481  | 500  | GAGCUCUC<br>UUCAGUCC<br>ACUC   |  | GAUUGGA<br>UUGCAGA<br>GGGCGC       | Translation | reverse complement | 1 |
| miR319d-3p | <i>ZmFAR1-16</i> | 5 | -1 | 1 | 20 | 1346 | 1365 | UUGGACUG<br>AAGGGUGC<br>UCCC   |  | AGGAAUG<br>UCUUUUG<br>GUCUGA       | Cleavage    |                    | 1 |
| miR390a-5p | <i>ZmFAR1-4</i>  | 5 | -1 | 1 | 21 | 1007 | 1027 | AAGCUCAG<br>GAGGGUA<br>GCGCC   |  | UGCGCAC<br>UUUCUCU<br>UUAGCUU      | Cleavage    | reverse complement | 1 |
| miR390b-5p | <i>ZmFAR1-4</i>  | 5 | -1 | 1 | 21 | 1007 | 1027 | AAGCUCAG<br>GAGGGUA<br>GCGCC   |  | UGCGCAC<br>UUUCUCU<br>UUAGCUU      | Cleavage    | reverse complement | 1 |
| miR393a-3p | <i>ZmFAR1-7</i>  | 5 | -1 | 1 | 22 | 1530 | 1551 | AUCAGUGC<br>AAUCCCU<br>UGGAAU  |  | UGAUCUA<br>AGGAAGU<br>GCAUUGA<br>U | Translation | reverse complement | 1 |
| miR393a-5p | <i>ZmFAR1-6</i>  | 5 | -1 | 1 | 22 | 2614 | 2635 | UCCAAAGG<br>GAUCGCAU<br>UGAUCU |  | ACGUUUU<br>UGUCAUC<br>UCUUUGG<br>A | Cleavage    |                    | 1 |
| miR393b-5p | <i>ZmFAR1-6</i>  | 5 | -1 | 1 | 22 | 2614 | 2635 | UCCAAAGG<br>GAUCGCAU<br>UGAUCC |  | ACGUUUU<br>UGUCAUC<br>UCUUUGG<br>A | Cleavage    |                    | 1 |
| miR393c-5p | <i>ZmFAR1-6</i>  | 5 | -1 | 1 | 22 | 2614 | 2635 | UCCAAAGG<br>GAUCGCAU<br>UGAUCU |  | ACGUUUU<br>UGUCAUC<br>UCUUUGG<br>A | Cleavage    |                    | 1 |
| miR395a-3p | <i>ZmFAR1-4</i>  | 5 | -1 | 1 | 21 | 1922 | 1942 | GUGAAGUG<br>UUUGGGG<br>AACUC   |  | CAACUCU<br>UCCAGAC<br>AUUUCAG      | Cleavage    | reverse complement | 1 |
| miR395b-3p | <i>ZmFAR1-4</i>  | 5 | -1 | 1 | 21 | 1922 | 1942 | GUGAAGUG<br>UUUGGGG<br>AACUC   |  | CAACUCU<br>UCCAGAC<br>AUUUCAG      | Cleavage    | reverse complement | 1 |
| miR395c-3p | <i>ZmFAR1-14</i> | 5 | -1 | 1 | 21 | 1959 | 1979 | GUGAAGUG<br>UUUGGAG<br>AACUC   |  | GAGUUUC<br>UCUGAAU<br>ACUUUUA      | Cleavage    |                    | 1 |
| miR395c-5p | <i>ZmFAR1-13</i> | 5 | -1 | 1 | 22 | 2842 | 2863 | GUUCCUG<br>CAAACACU<br>UCACCA  |  | GUCUAAA<br>GUGUUUG<br>CUGAGAA<br>G | Cleavage    |                    | 1 |
| miR395d-3p | <i>ZmFAR1-4</i>  | 5 | -1 | 1 | 21 | 1922 | 1942 | GUGAAGUG<br>UUUGGGG<br>AACUC   |  | CAACUCU<br>UCCAGAC<br>AUUUCAG      | Cleavage    | reverse complement | 1 |
| miR395d-5p | <i>ZmFAR1-2</i>  | 5 | -1 | 1 | 22 | 3818 | 3839 | GUUCUAUG<br>CAAGCACU<br>UCACGA |  | CCAAGAA<br>GUGCUUC<br>UAUCGAA<br>U | Cleavage    | reverse complement | 1 |

|            |                  |   |    |   |    |      |      |                                |                                                                                      |                                    |             |                       |   |
|------------|------------------|---|----|---|----|------|------|--------------------------------|--------------------------------------------------------------------------------------|------------------------------------|-------------|-----------------------|---|
| miR395c-3p | <i>ZmFAR1-4</i>  | 5 | -1 | 1 | 21 | 1922 | 1942 | GUGAAGUG<br>UUUGGGGG<br>AACUC  |    | CAACUCU<br>UCCAGAC<br>AUUCAG       | Cleavage    | reverse<br>complement | 1 |
| miR395f-3p | <i>ZmFAR1-4</i>  | 5 | -1 | 1 | 21 | 1922 | 1942 | GUGAAGUG<br>UUUGGGGG<br>AACUC  |    | CAACUCU<br>UCCAGAC<br>AUUCAG       | Cleavage    | reverse<br>complement | 1 |
| miR395g-3p | <i>ZmFAR1-4</i>  | 5 | -1 | 1 | 21 | 1922 | 1942 | GUGAAGUG<br>UUUGGGGG<br>AACUC  |    | CAACUCU<br>UCCAGAC<br>AUUCAG       | Cleavage    | reverse<br>complement | 1 |
| miR395g-5p | <i>ZmFAR1-2</i>  | 5 | -1 | 1 | 22 | 3818 | 3839 | GUUCUAUG<br>CAAGCACU<br>UCACGA |    | CCAAGAA<br>GUGCUUC<br>UAUCGAA<br>U | Cleavage    | reverse<br>complement | 1 |
| miR395h-3p | <i>ZmFAR1-4</i>  | 5 | -1 | 1 | 21 | 1922 | 1942 | GUGAAGUG<br>UUUGGGGG<br>AACUC  |    | CAACUCU<br>UCCAGAC<br>AUUCAG       | Cleavage    | reverse<br>complement | 1 |
| miR395i-3p | <i>ZmFAR1-4</i>  | 5 | -1 | 1 | 21 | 1922 | 1942 | GUGAAGUG<br>UUUGGGGG<br>AACUC  |    | CAACUCU<br>UCCAGAC<br>AUUCAG       | Cleavage    | reverse<br>complement | 1 |
| miR395j-3p | <i>ZmFAR1-4</i>  | 5 | -1 | 1 | 21 | 1922 | 1942 | GUGAAGUG<br>UUUGGGGG<br>AACUC  |    | CAACUCU<br>UCCAGAC<br>AUUCAG       | Cleavage    | reverse<br>complement | 1 |
| miR395k-5p | <i>ZmFAR1-15</i> | 5 | -1 | 1 | 22 | 587  | 608  | GUUUCUU<br>CAAGCACU<br>UCACAU  |  | CGGAGGG<br>GUGCUGG<br>AGGGAAG<br>U | Translation | reverse<br>complement | 1 |
| miR395l-3p | <i>ZmFAR1-14</i> | 5 | -1 | 1 | 21 | 1959 | 1979 | GUGAAGUG<br>UUUGGGAGG<br>AACUC |  | GAGUUUC<br>UCUGAAU<br>ACUUUUA      | Cleavage    |                       | 1 |
| miR395m-3p | <i>ZmFAR1-14</i> | 5 | -1 | 1 | 21 | 1959 | 1979 | GUGAAGUG<br>UUUGGGAGG<br>AACUC |  | GAGUUUC<br>UCUGAAU<br>ACUUUUA      | Cleavage    |                       | 1 |
| miR395n-3p | <i>ZmFAR1-4</i>  | 5 | -1 | 1 | 21 | 1922 | 1942 | GUGAAGUG<br>UUUGGGGG<br>AACUC  |  | CAACUCU<br>UCCAGAC<br>AUUCAG       | Cleavage    | reverse<br>complement | 1 |
| miR395p-3p | <i>ZmFAR1-4</i>  | 5 | -1 | 1 | 21 | 1922 | 1942 | GUGAAGUG<br>UUUGGGGG<br>AACUC  |  | CAACUCU<br>UCCAGAC<br>AUUCAG       | Cleavage    | reverse<br>complement | 1 |
| miR396f-3p | <i>ZmFAR1-6</i>  | 5 | -1 | 1 | 21 | 814  | 834  | GGUCAAGA<br>AAGCUGUG<br>GGAAG  |  | ACGCCCA<br>GGGCCUU<br>CUUGAUU      | Translation |                       | 1 |
| miR397a-5p | <i>ZmFAR1-11</i> | 5 | -1 | 1 | 21 | 2098 | 2118 | UCAUUGAG<br>CGCAGCGU<br>UGAUG  |  | GUACAAG<br>AUUGUGC<br>UUGAUGA      | Cleavage    |                       | 1 |
| miR397b-5p | <i>ZmFAR1-11</i> | 5 | -1 | 1 | 21 | 2098 | 2118 | UCAUUGAG<br>CGCAGCGU<br>UGAUG  |  | GUACAAG<br>AUUGUGC<br>UUGAUGA      | Cleavage    |                       | 1 |
| miR398a-3p | <i>ZmFAR1-1</i>  | 5 | -1 | 1 | 21 | 2617 | 2637 | UGUGUUCU<br>CAGGUCGC<br>CCCCG  |  | GAGGAGC<br>CAUUUGA<br>GGGCAUG      | Cleavage    | reverse<br>complement | 1 |

|            |                  |   |    |   |    |      |      |                               |  |                               |             |                       |   |
|------------|------------------|---|----|---|----|------|------|-------------------------------|--|-------------------------------|-------------|-----------------------|---|
| miR398b-3p | <i>ZmFAR1-1</i>  | 5 | -1 | 1 | 21 | 2617 | 2637 | UGUGUUCU<br>CAGGUCGC<br>CCCCG |  | GAGGAGC<br>CAUUUGA<br>GGGCAUG | Cleavage    | reverse<br>complement | 1 |
| miR398b-5p | <i>ZmFAR1-4</i>  | 5 | -1 | 1 | 21 | 6091 | 6111 | GGGGCGGA<br>CUGGGAAC<br>ACAUG |  | UCUCUUU<br>UCUCAGU<br>UCUCCCU | Cleavage    | reverse<br>complement | 1 |
| miR399a-5p | <i>ZmFAR1-13</i> | 5 | -1 | 1 | 21 | 325  | 345  | GUGCGGUU<br>CUCCUCUG<br>GCACG |  | AGGGGCG<br>GAGGGGA<br>GCUGCAG | Cleavage    |                       | 1 |
| miR399d-5p | <i>ZmFAR1-10</i> | 5 | -1 | 1 | 21 | 8952 | 8972 | GUGUGGCU<br>CUCCUCUG<br>GCAUG |  | CAUACCA<br>AAGGAGA<br>GCUCUAU | Cleavage    |                       | 1 |
| miR399d-5p | <i>ZmFAR1-13</i> | 5 | -1 | 1 | 21 | 325  | 345  | GUGUGGCU<br>CUCCUCUG<br>GCAUG |  | AGGGGCG<br>GAGGGGA<br>GCUGCAG | Cleavage    |                       | 1 |
| miR399f-3p | <i>ZmFAR1-10</i> | 5 | -1 | 1 | 21 | 281  | 301  | UGCCAAAG<br>GAAAUUUG<br>CCCCG |  | GCGGGGA<br>AAUUUCC<br>AUUGCCU | Cleavage    |                       | 1 |
| miR399g-3p | <i>ZmFAR1-8</i>  | 5 | -1 | 1 | 21 | 849  | 869  | UGCCAAAG<br>GGGAUUUG<br>CCCGG |  | GAUGACU<br>AAUUUCU<br>UUUGGCG | Cleavage    | reverse<br>complement | 1 |
| miR399g-5p | <i>ZmFAR1-15</i> | 5 | -1 | 1 | 21 | 2219 | 2239 | GGGCAACC<br>CCCCGUUG<br>GCAGG |  | AGAGACA<br>AGGGUGG<br>GUUGCCC | Translation | reverse<br>complement | 1 |
| miR399h-5p | <i>ZmFAR1-10</i> | 5 | -1 | 1 | 21 | 8952 | 8972 | GUGCAGUU<br>CUCCUCUG<br>GCACG |  | CAUACCA<br>AAGGAGA<br>GCUCUAU | Cleavage    |                       | 1 |
| miR399i-5p | <i>ZmFAR1-10</i> | 5 | -1 | 1 | 21 | 8952 | 8972 | GUGCGGCU<br>CUCCUCUG<br>GCAUG |  | CAUACCA<br>AAGGAGA<br>GCUCUAU | Cleavage    |                       | 1 |
| miR399j-5p | <i>ZmFAR1-16</i> | 5 | -1 | 1 | 21 | 881  | 901  | AGGCAGCU<br>CUCCUCUG<br>GCAGG |  | UGUUCUA<br>AAGGAGG<br>GCAGUCU | Cleavage    |                       | 1 |
| miR408a    | <i>ZmFAR1-10</i> | 5 | -1 | 1 | 21 | 3688 | 3708 | CUGCACUG<br>CCUCUCC<br>CUGGC  |  | GGAAGAC<br>AAGUGGC<br>AGUGCGG | Translation |                       | 1 |
| miR408b-3p | <i>ZmFAR1-10</i> | 5 | -1 | 1 | 21 | 3688 | 3708 | CUGCACUG<br>CCUCUCC<br>CUGGC  |  | GGAAGAC<br>AAGUGGC<br>AGUGCGG | Translation |                       | 1 |
| miR482-3p  | <i>ZmFAR1-10</i> | 5 | -1 | 1 | 20 | 3622 | 3641 | UCUUCUU<br>GUUCCUCC<br>CAUU   |  | ACUAGGA<br>GGAGCAA<br>AGGAGG  | Cleavage    |                       | 2 |
| miR482-3p  | <i>ZmFAR1-8</i>  | 5 | -1 | 1 | 20 | 172  | 191  | UCUUCUU<br>GUUCCUCC<br>CAUU   |  | GAUGCAG<br>AGAACGA<br>GGAGGA  | Cleavage    | reverse<br>complement | 1 |
| miR482-5p  | <i>ZmFAR1-6</i>  | 5 | -1 | 1 | 19 | 2536 | 2554 | UGGGAGAU<br>GAAGGAGC<br>CUU   |  | GAGGCAU<br>UUUUGUU<br>UCCCU   | Cleavage    |                       | 1 |

|           |                 |   |    |   |    |      |      |                               |                         |                               |          |                       |   |
|-----------|-----------------|---|----|---|----|------|------|-------------------------------|-------------------------|-------------------------------|----------|-----------------------|---|
| miR482-5p | <i>ZmFAR1-7</i> | 5 | -1 | 1 | 19 | 1087 | 1105 | UGGGAGAU<br>GAAGGAGC<br>CUU   | ... ..<br>... ..<br>... | GAGGACC<br>CUUCAUU<br>UUUCU   | Cleavage | reverse<br>complement | 1 |
| miR529-5p | <i>ZmFAR1-3</i> | 5 | -1 | 1 | 21 | 3647 | 3667 | AGAAGAGA<br>GAGAGUAC<br>AGCCU | ... ..<br>... ..<br>... | GAGCUUC<br>AUUUUCU<br>UUCUUUC | Cleavage |                       | 1 |

**Supplementary Table S4. The primer sequences used in qRT-PCR.**

| Primer name | Primer sequence      |
|-------------|----------------------|
| qACTIN-F    | ATTGTCGGCAACTGGGATG  |
| qACTIN-R    | TCAGAGGAGCCTCGGTCAGC |
| qZmFAR1-1-F | CCAAGCAACTCCCACTAA   |
| qZmFAR1-1-R | TACCCAGAACGGAACCAG   |
| qZmFAR1-2-F | GATACCAACAAGCGAAAG   |
| qZmFAR1-2-R | TGGTCTGGGATGAACTGG   |
| qZmFAR1-3-F | GACAACCATACACAACCT   |
| qZmFAR1-3-R | TCCGGACATGAGTGCCAA   |
| qZmFAR1-4-F | GACGACTGGGTGGTCTAC   |
| qZmFAR1-4-R | ATGCGTGCGCAGATGAG    |
| qZmFAR1-5-F | ATCTACCTTGCCATCCACA  |
| qZmFAR1-5-R | TTGTCAACCACGTCTCAAA  |
| qZmFAR1-6-F | ATTGAAGGAGCCTGACG    |
| qZmFAR1-6-R | TGAGGAGGTAGGCGTAGT   |
| qZmFAR1-7-F | GCTGCACAGCGTCCATAT   |
| qZmFAR1-7-R | GGCAATGCGAACAGAGAA   |

---

|              |                        |
|--------------|------------------------|
| qZmFAR1-8-F  | AGCAGTCCTACTTCACCG     |
| qZmFAR1-8-R  | CCAGTCGGATAACCTTCC     |
| qZmFAR1-9-F  | AAGGTCAATCAGGTGTGG     |
| qZmFAR1-9-R  | AGAATAGACACATCGGCG     |
| qZmFAR1-10-F | CTTCATCGACCACTAACT     |
| qZmFAR1-10-R | ACCTTGCCATTGCAGGG      |
| qZmFAR1-11-F | CGAACATGTAGGCTTCAG     |
| qZmFAR1-11-R | CTAGGTGTGCCTGCTGAC     |
| qZmFAR1-12-F | CTACTGGTATTAGGTTCG     |
| qZmFAR1-12-R | GATTGGACTAGCACCTAC     |
| qZmFAR1-13-F | CTGGACGGTGATGCGATG     |
| qZmFAR1-13-R | CCTTAGGCATCGCACGTG     |
| qZmFAR1-14-F | AAGAAGCCAGTTGAGCCTAGCA |
| qZmFAR1-14-R | CCCGGTCTGCACTAACAAT    |
| qZmFAR1-15-F | CTACACGCATGAGGAGC      |
| qZmFAR1-15-R | TCTGGGCGTCATCCTTG      |
| qZmFAR1-16-F | TTAACAATGTCTACGGGTC    |
| qZmFAR1-16-R | CCCATCCTTCATAGCACA     |

---
